# Supplementary material for: Halide-free deep eutectic solvents constructed from natural compounds for converting carbon dioxide to cyclic carbonate
Source: Royal Society of Chemistry journal article supplement (doi:10.1039/d4cc06282e), 2025-01-01
Supplement: d4cc06282e1.pdf [file d4cc06282e1.pdf]

# Supplementary **Information**

For

## **Halide-free deep eutectic solvents constructed from natural compounds for converting carbon dioxide to cyclic carbonate**

Wen-Wang Yu, Xiang-Guang Meng,\* Wen Li, Jie Zhou, Xian-Jian Ma and Dan-Dan Chu

*Key Laboratory of Green Chemistry and Technology Ministry of Education, College of Chemistry, Sichuan University, Chengdu 610064, P.R. China.*

\*Corresponding Author.

Email address: mengxgchem@163.com

# Table of Contents

|                                                                                                                                                                                 |              |
|---------------------------------------------------------------------------------------------------------------------------------------------------------------------------------|--------------|
| <b>Experimental section</b>                                                                                                                                                     | Page S3-S4   |
| <b>Fig. S1.</b> TG curve of <b>Bet/Gly</b> DESs.                                                                                                                                | Page S6      |
| <b>Fig. S2.</b> FT-IR spectra of Lca, Ga and Lca/Ga.                                                                                                                            | Page S6      |
| <b>Fig. S3.</b> FT-IR spectra of Lca, Gly and Lca/Gly.                                                                                                                          | Page S7      |
| <b>Fig. S4.</b> FT-IR spectra of Bet, Ga and Bet/Ga.                                                                                                                            | Page S7      |
| <b>Fig. S5.</b> FT-IR spectra of Bet, CA and Bet/CA.                                                                                                                            | Page S8      |
| <b>Fig. S6.</b> FT-IR spectra of Lca, CA and Lca/CA.                                                                                                                            | Page S8      |
| <b>Fig. S7</b> Effects of (a) reaction temperature, (b) CO <sub>2</sub> pressure, (c) time and (d) catalyst loading on the yield and selectivity of SC.                         | Page S9      |
| <b>Fig. S8.</b> Cyclic performance of the <b>Bet/Gly</b> catalyst.                                                                                                              | Page S9      |
| <b>Fig. S9.</b> FT-IR spectra of fresh and recycled <b>Bet/Gly</b> DESs.                                                                                                        | Page S10     |
| <b>Fig. S10</b> The charge distribution of <b>2c</b> was calculated by natural bond orbital (NBO) analysis at the M06-2X/Def2-TZVPP level with the Gaussian 09 program package. | Page S10     |
| <b>Fig. S11</b> The charge distribution of <b>2d</b> was calculated by natural bond orbital (NBO) analysis at the M06-2X/Def2-TZVPP level with the Gaussian 09 program package. | Page S11     |
| <b>Scheme S1</b> The cycloaddition of CO <sub>2</sub> with various epoxides at 80 °C and 0.5 MPa.                                                                               | Page S11     |
| <b>Table S1.</b> The comparison of various halide-free catalytic systems for the cycloaddition of CO <sub>2</sub> and epoxide.                                                  | Page S12     |
| <b>Table S2.</b> The apparent first-order rate constants $k_{obs}$ for the cycloaddition at 1 MPa and different temperature.                                                    | Page S12     |
| <b>Scheme S2.</b> The possible catalysis mechanism for the cycloaddition of CO <sub>2</sub> with epoxides catalyzed by <b>Bet/Gly</b> .                                         | Page S13     |
| <b>Cartesian Coordinates of the Optimized Geometries</b>                                                                                                                        | Page S13-S23 |
| <b>Fig. S12.</b> <sup>1</sup> H NMR spectrum of <b>2a</b> (400 MHz, CDCl <sub>3</sub> , 298 K).                                                                                 | Page S24     |
| <b>Fig. S13.</b> <sup>13</sup> C NMR spectrum of <b>2a</b> (126 MHz, CDCl <sub>3</sub> , 298 K).                                                                                | Page S24     |
| <b>Fig. S14.</b> <sup>1</sup> H NMR spectrum of <b>2b</b> (400 MHz, CDCl <sub>3</sub> , 298 K).                                                                                 | Page S25     |
| <b>Fig. S15.</b> <sup>13</sup> C NMR spectrum of <b>2b</b> (126 MHz, CDCl <sub>3</sub> , 298 K).                                                                                | Page S25     |
| <b>Fig. S16.</b> <sup>1</sup> H NMR spectrum of <b>2c</b> (400 MHz, CDCl <sub>3</sub> , 298 K).                                                                                 | Page S26     |
| <b>Fig. S17.</b> <sup>13</sup> C NMR spectrum of <b>2c</b> (126 MHz, CDCl <sub>3</sub> , 298 K).                                                                                | Page S26     |
| <b>Fig. S18.</b> <sup>1</sup> H NMR spectrum of <b>2d</b> (400 MHz, CDCl <sub>3</sub> , 298 K).                                                                                 | Page S27     |
| <b>Fig. S19.</b> <sup>13</sup> C NMR spectrum of <b>2d</b> (126 MHz, CDCl <sub>3</sub> , 298 K).                                                                                | Page S27     |
| <b>Fig. S20.</b> <sup>1</sup> H NMR spectrum of <b>2e</b> (400 MHz, CDCl <sub>3</sub> , 298 K).                                                                                 | Page S28     |
| <b>Fig. S21.</b> <sup>13</sup> C NMR spectrum of <b>2e</b> (126 MHz, CDCl <sub>3</sub> , 298 K).                                                                                | Page S28     |
| <b>Fig. S22.</b> <sup>1</sup> H NMR spectrum of <b>2f</b> (400 MHz, CDCl <sub>3</sub> , 298 K).                                                                                 | Page S29     |
| <b>Fig. S23.</b> <sup>13</sup> C NMR spectrum of <b>2f</b> (126 MHz, CDCl <sub>3</sub> , 298 K).                                                                                | Page S29     |
| <b>Fig. S24.</b> <sup>1</sup> H NMR spectrum of <b>2g</b> (400 MHz, CDCl <sub>3</sub> , 298 K).                                                                                 | Page S30     |
| <b>Fig. S25.</b> <sup>13</sup> C NMR spectrum of <b>2g</b> (126 MHz, CDCl <sub>3</sub> , 298 K).                                                                                | Page S30     |
| <b>Fig. S26.</b> <sup>1</sup> H NMR spectrum of <b>2h</b> (400 MHz, CDCl <sub>3</sub> , 298 K).                                                                                 | Page S31     |

|                                                                                                  |          |
|--------------------------------------------------------------------------------------------------|----------|
| <b>Fig. S27.</b> <sup>13</sup> C NMR spectrum of <b>2h</b> (126 MHz, CDCl <sub>3</sub> , 298 K). | Page S31 |
| <b>Fig. S28.</b> <sup>1</sup> H NMR spectrum of <b>2i</b> (400 MHz, CDCl <sub>3</sub> , 298 K).  | Page S32 |
| <b>Fig. S29.</b> <sup>13</sup> C NMR spectrum of <b>2i</b> (126 MHz, CDCl <sub>3</sub> , 298 K). | Page S32 |
| <b>Fig. S30.</b> <sup>1</sup> H NMR spectrum of <b>2j</b> (400 MHz, CDCl <sub>3</sub> , 298 K).  | Page S33 |
| <b>Fig. S31.</b> <sup>13</sup> C NMR spectrum of <b>2j</b> (126 MHz, CDCl <sub>3</sub> , 298 K). | Page S33 |
| <b>Fig. S32.</b> <sup>1</sup> H NMR spectrum of <b>2k</b> (400 MHz, CDCl <sub>3</sub> , 298 K).  | Page S34 |
| <b>Fig. S33.</b> <sup>13</sup> C NMR spectrum of <b>2k</b> (126 MHz, CDCl <sub>3</sub> , 298 K). | Page S34 |
| <b>Fig. S34.</b> <sup>1</sup> H NMR spectrum of <b>2l</b> (400 MHz, CDCl <sub>3</sub> , 298 K).  | Page S35 |
| <b>Fig. S35.</b> <sup>13</sup> C NMR spectrum of <b>2l</b> (126 MHz, CDCl <sub>3</sub> , 298 K). | Page S35 |
| <b>Fig. S36.</b> <sup>1</sup> H NMR spectrum of <b>2m</b> (400 MHz, CDCl <sub>3</sub> , 298 K).  | Page S36 |
| <b>Fig. S37.</b> <sup>13</sup> C NMR spectrum of <b>2m</b> (126 MHz, CDCl <sub>3</sub> , 298 K). | Page S36 |
| <b>Fig. S38.</b> <sup>1</sup> H NMR spectrum of <b>2n</b> (400 MHz, CDCl <sub>3</sub> , 298 K).  | Page S37 |
| <b>Fig. S39.</b> <sup>13</sup> C NMR spectrum of <b>2n</b> (126 MHz, CDCl <sub>3</sub> , 298 K). | Page S37 |
| <b>Fig. S40.</b> <sup>1</sup> H NMR spectrum of <b>2o</b> (400 MHz, CDCl <sub>3</sub> , 298 K).  | Page S38 |
| <b>Fig. S41.</b> <sup>13</sup> C NMR spectrum of <b>2o</b> (126 MHz, CDCl <sub>3</sub> , 298 K). | Page S38 |
| <b>Fig. S42.</b> <sup>1</sup> H NMR spectrum of <b>2p</b> (400 MHz, CDCl <sub>3</sub> , 298 K).  | Page S39 |
| <b>Fig. S43.</b> <sup>13</sup> C NMR spectrum of <b>2p</b> (126 MHz, CDCl <sub>3</sub> , 298 K). | Page S39 |
| <b>Fig. S44.</b> <sup>1</sup> H NMR spectrum of <b>2q</b> (400 MHz, CDCl <sub>3</sub> , 298 K).  | Page S40 |
| <b>Fig. S45.</b> <sup>13</sup> C NMR spectrum of <b>2q</b> (126 MHz, CDCl <sub>3</sub> , 298 K). | Page S40 |
| <b>Fig. S46.</b> <sup>1</sup> H NMR spectrum of <b>2r</b> (400 MHz, CDCl <sub>3</sub> , 298 K).  | Page S41 |
| <b>Fig. S47.</b> <sup>13</sup> C NMR spectrum of <b>2r</b> (126 MHz, CDCl <sub>3</sub> , 298 K). | Page S41 |
| <b>Fig. S48.</b> <sup>1</sup> H NMR spectrum of <b>2s</b> (400 MHz, CDCl <sub>3</sub> , 298 K).  | Page S42 |
| <b>Fig. S49.</b> <sup>13</sup> C NMR spectrum of <b>2s</b> (126 MHz, CDCl <sub>3</sub> , 298 K). | Page S42 |

## Experimental section

### *Materials and Chemicals*

Betaine (Bet), glycerol (Gly), L-carnitine (Lca), citric acid (CA), glycolic acid (Ga), styrene oxide (SO), propylene oxide (PO), epichlorohydrin, epibromohydrin, 1,2-epoxybutane, (2,3-epoxypropyl)-benzene, isobutylene oxide, 2-(chloromethyl)-2-methyloxirane, tert-butyl glycidyl ether, butyl glycidyl ether, glycidyl phenyl ether, allyl glycidyl ether, furfuryl glycidyl ether, glycidyl methacrylate and cyclohexene oxide were purchased from Aladdin Reagent and used without further purification. CO<sub>2</sub> (99.999%) is supplied by

Sichuan Chengdu Qiaoyuan Gas Company.

### *Instrumentations*

$^1\text{H}$  NMR spectra were recorded at ambient temperature using a Bruker Avance III 400 spectrometer ( $^1\text{H}$  NMR 400 MHz,  $^{13}\text{C}$  NMR 126 MHz). Fourier transform infrared spectroscopy (FT-IR) spectra were recorded on a Bruker Alpha spectrometer. Thermogravimetric analyses (TGA) were carried out with a PerkinElmer Pyris 1 TGA under  $\text{N}_2$  atmosphere with the  $20\text{ }^\circ\text{C}/\text{min}$  heating rate ranging from  $30\text{ }^\circ\text{C}$  to  $600\text{ }^\circ\text{C}$ .

### *Synthesis of DESs*

All DESs in this article were prepared according to the methods described in the literature.<sup>1</sup> Betaine (Bet) and glycerol (Gly) are added in a molar ratio of one to two to a round bottom flask, stirred magnetically at  $80\text{ }^\circ\text{C}$  for one hour until a uniform transparent liquid was formed, then cooled to room temperature and dried under vacuum at  $60\text{ }^\circ\text{C}$  for 24 hours to obtain Bet/Gly natural deep eutectic solvent. Other DESs including Bet/Ga, Bet/CA, Lca/Ga, Lca/Gly and Lca/CA were prepared using the same steps as above.

### *Cycloaddition reaction of $\text{CO}_2$ catalyzed by DESs*

The cycloaddition reaction between  $\text{CO}_2$  and styrene oxide (SO) was taken as the model reaction. Typically,  $37.5\text{ mmol}$  SO and  $0.6\text{ mol}\%$  DESs catalyst were put into stainless steel high-pressure autoclave equipped with stirring. The reactor was purged three times with  $\text{CO}_2$ , filled with  $1.0\text{ MPa}$   $\text{CO}_2$  and sealed. The reaction solution was heated to  $120\text{ }^\circ\text{C}$  and stirred at  $310\text{ r}\cdot\text{min}^{-1}$  for 6 h. After the reaction was completed, the high-pressure autoclave was cooled to room temperature and the remaining  $\text{CO}_2$  was slowly discharged from the reactor.  $20\text{ }\mu\text{L}$  of the reaction solution was taken out and dissolved in  $\text{CDCl}_3$ . The yield and selectivity of styrene carbonate (SC) was assessed by  $^1\text{H}$  NMR spectroscopy of the crude mixture. For other epoxides, the cycloaddition reaction proceeds in a similar manner. The reaction products were

separated by column chromatography. Spectra of  $^1\text{H}$  NMR and  $^{13}\text{C}$  NMR of cyclic carbonates were shown in the **Figures S12-S49** in the supplementary **information**.

#### *Calculation details*

To study the mechanism of the cycloaddition reaction between  $\text{CO}_2$  and epoxide catalyzed by Bet/Gly DESs, the density functional theory (DFT) calculations at the M06-2X/Def2-TZVPP level employing propylene oxide (PO) as the substrate was carried out with the Gaussian 09 program package. For transition state geometries, intrinsic reaction coordinate (IRC) calculations were carried out to confirm whether it is connected to reactants and products. Cartesian Coordinates of the Optimized Geometries can be found in the supplementary material. **The natural bond orbital (NBO) analysis was calculated at the M06-2X/Def2-TZVPP level by using Gaussian 09 program package.**

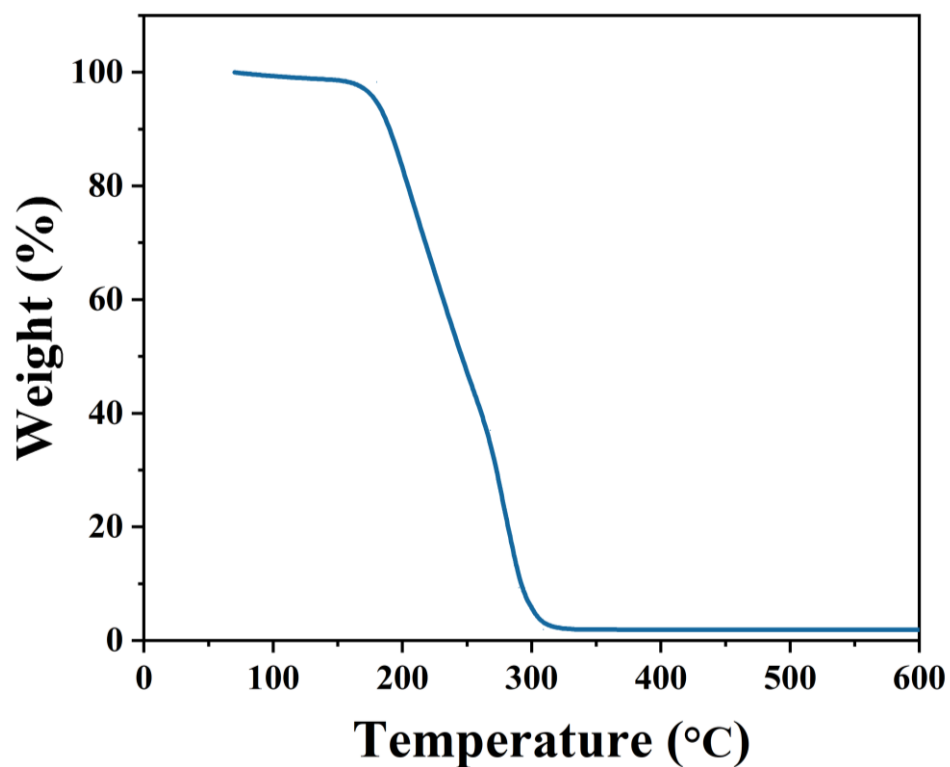

Fig. S1. TG curve of Bet/Gly DESs.

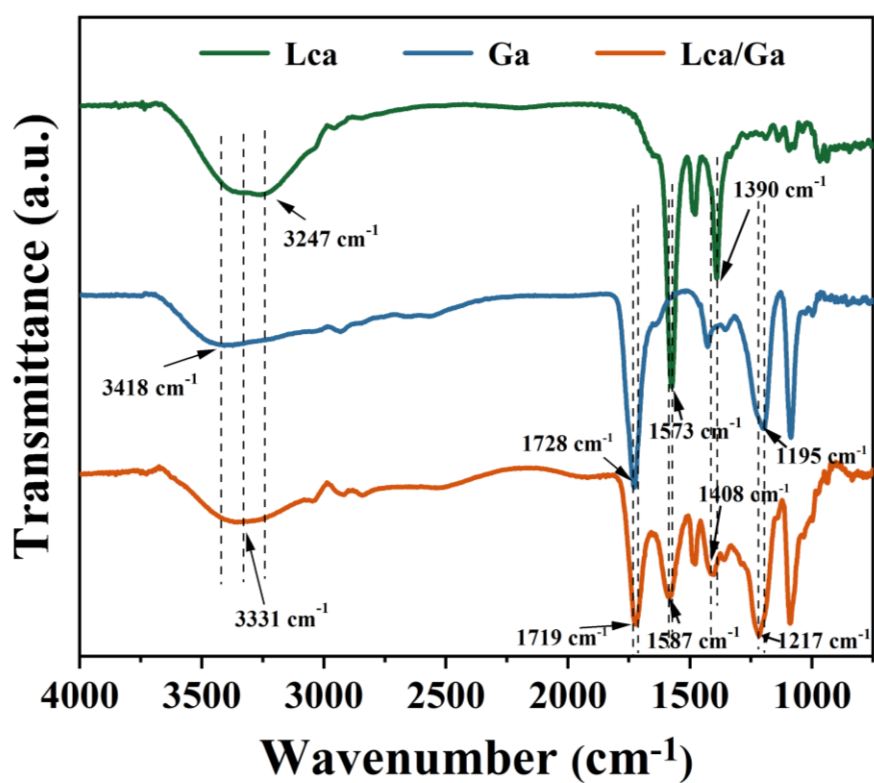

Fig. S2. FT-IR spectra of Lca, Ga and Lca/Ga.

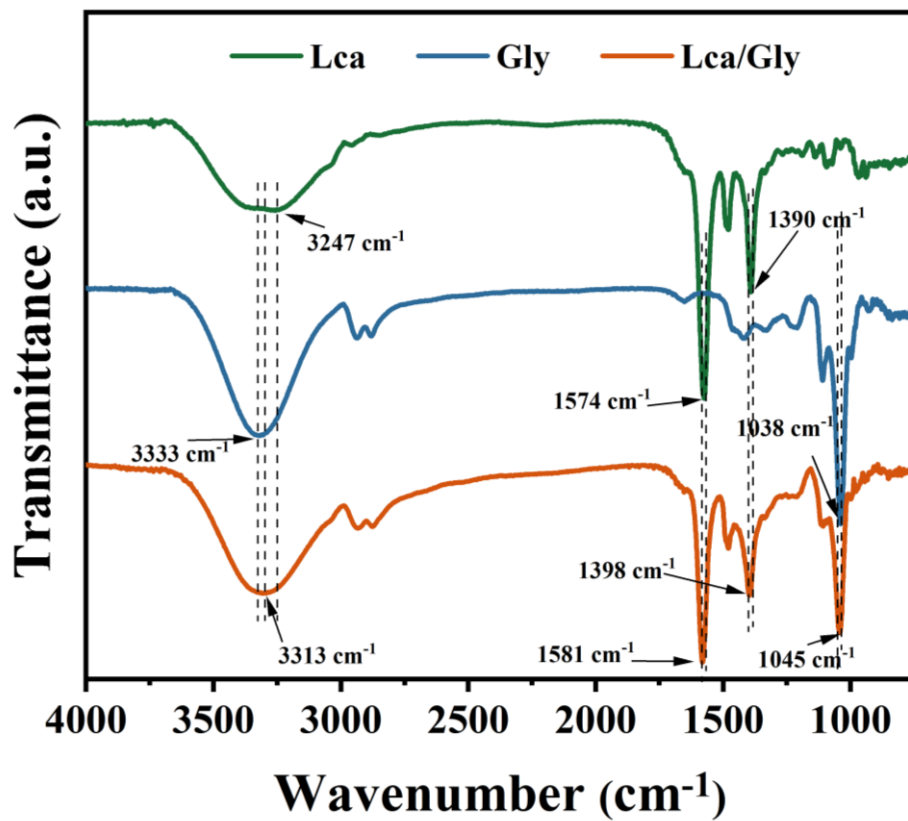

Fig. S3. FT-IR spectra of Lca, Gly and Lca/Gly.

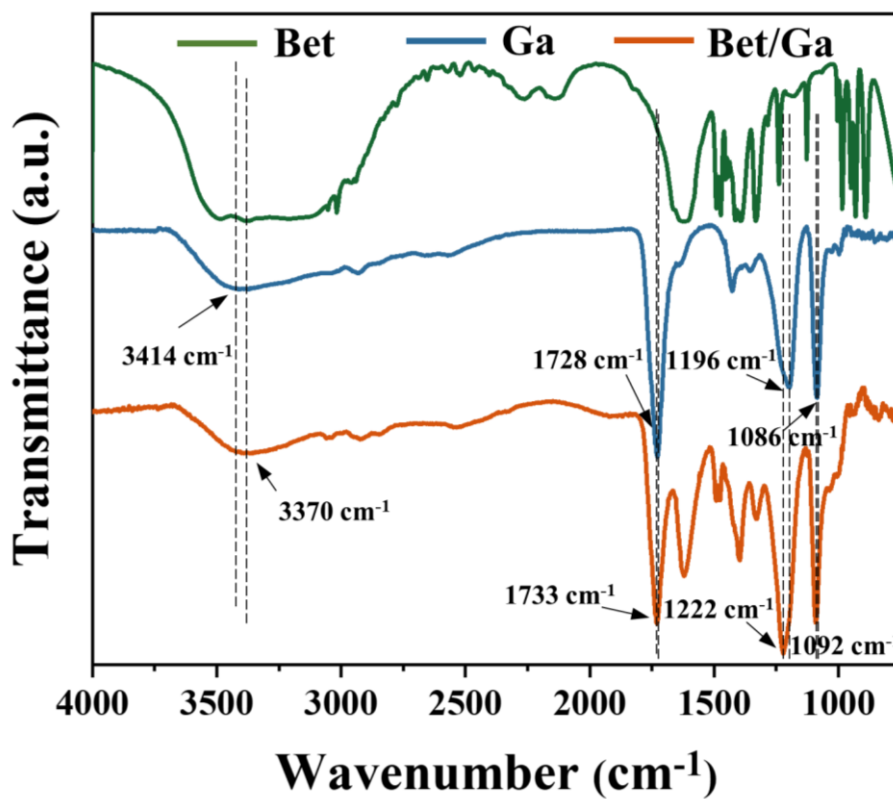

Fig. S4. FT-IR spectra of Bet, Ga and Bet/Ga.

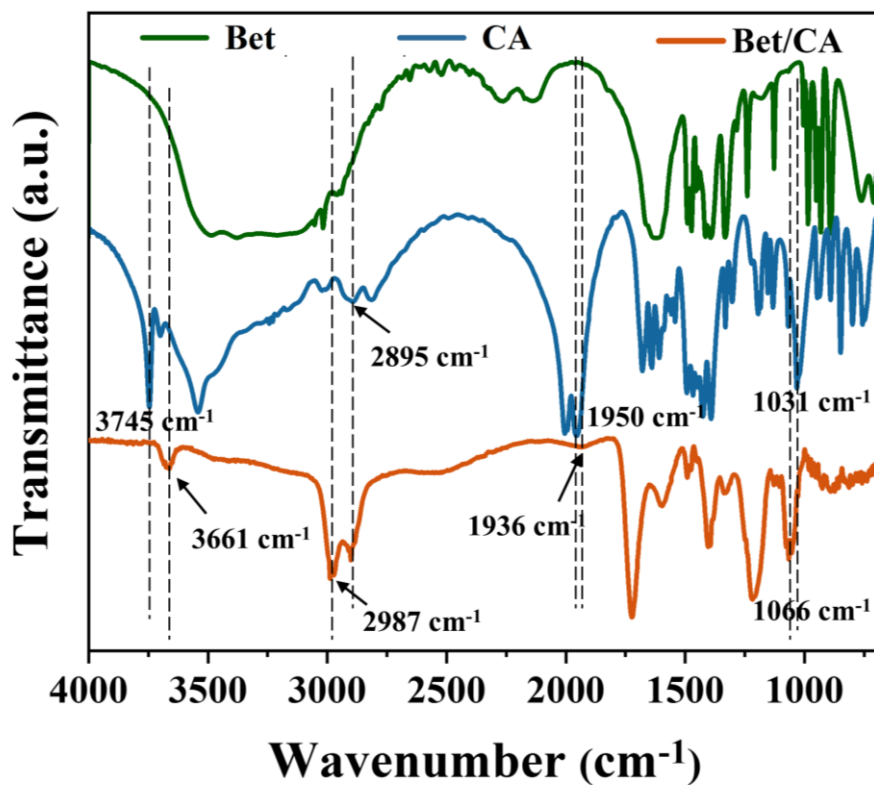

Fig. S5. FT-IR spectra of Bet, CA and Bet/CA.

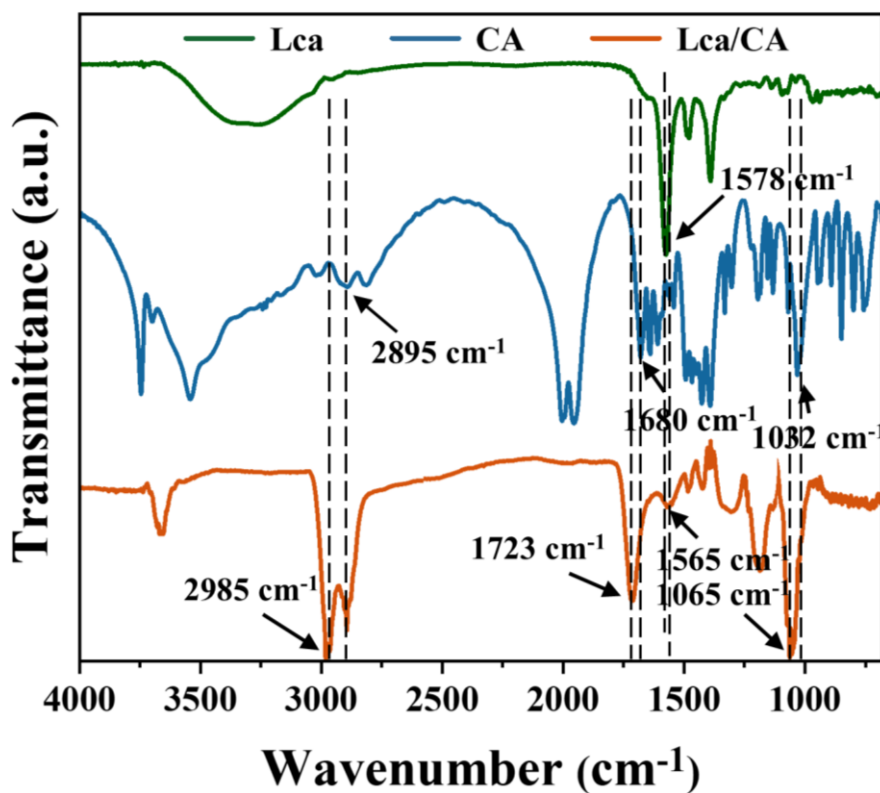

Fig. S6. FT-IR spectra of Lca, CA and Lca/CA.



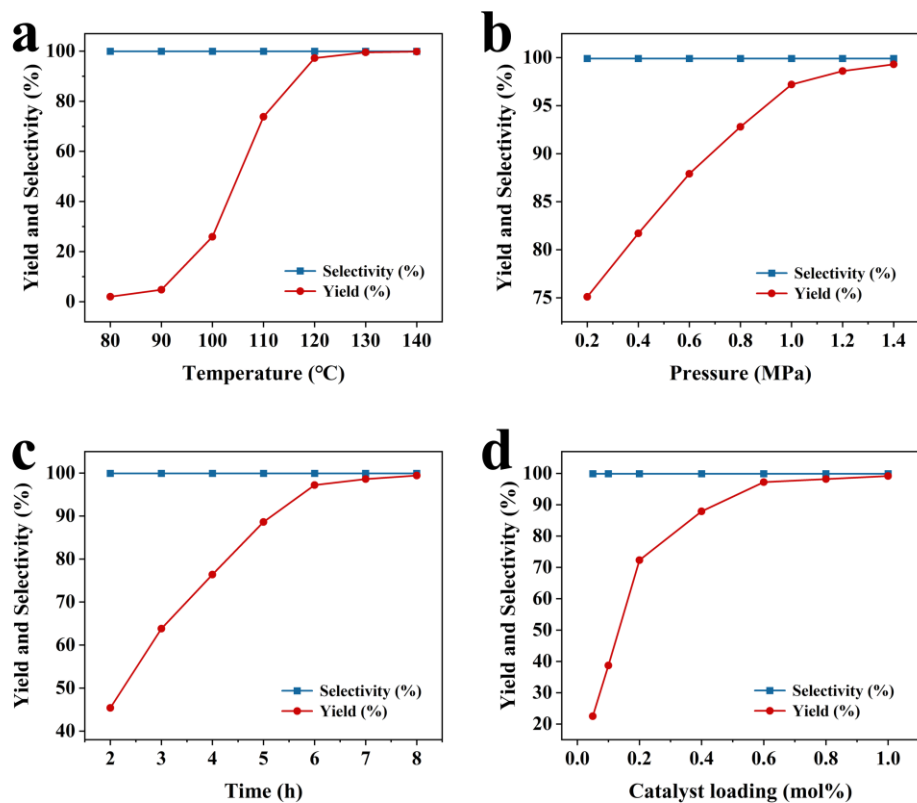

**Fig. S7** Effects of (a) reaction temperature, (b) CO<sub>2</sub> pressure, (c) time and (d) catalyst loading on the yield and selectivity of SC. Reaction conditions: 37.5 mmol SO, 120 °C, 1 Mpa CO<sub>2</sub>, 6 h, 0.6 mol% Bet/Gly.

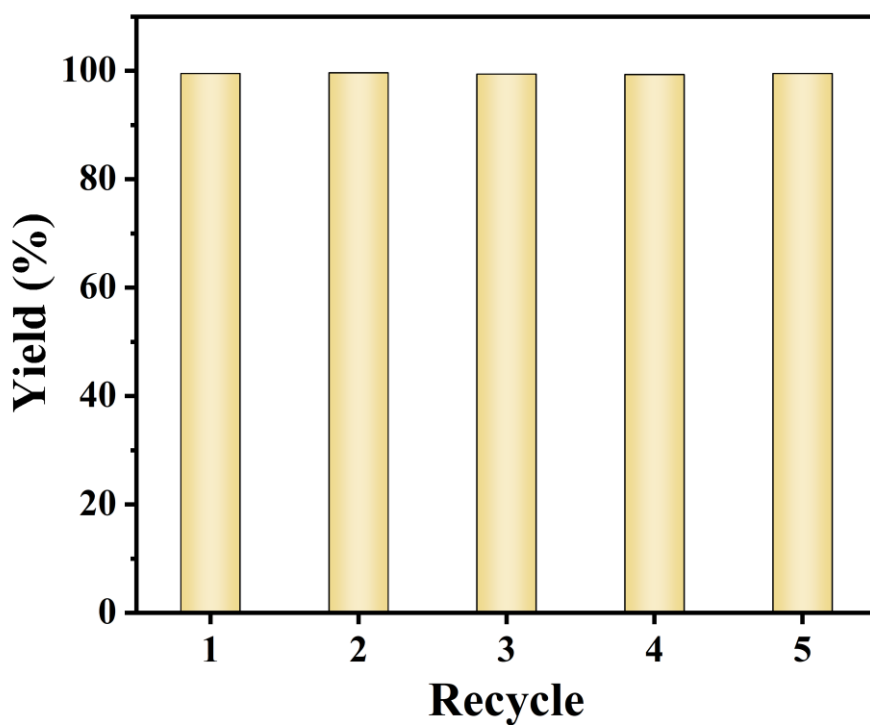

**Fig. S8** Cyclic performance of the Bet/Gly catalyst.

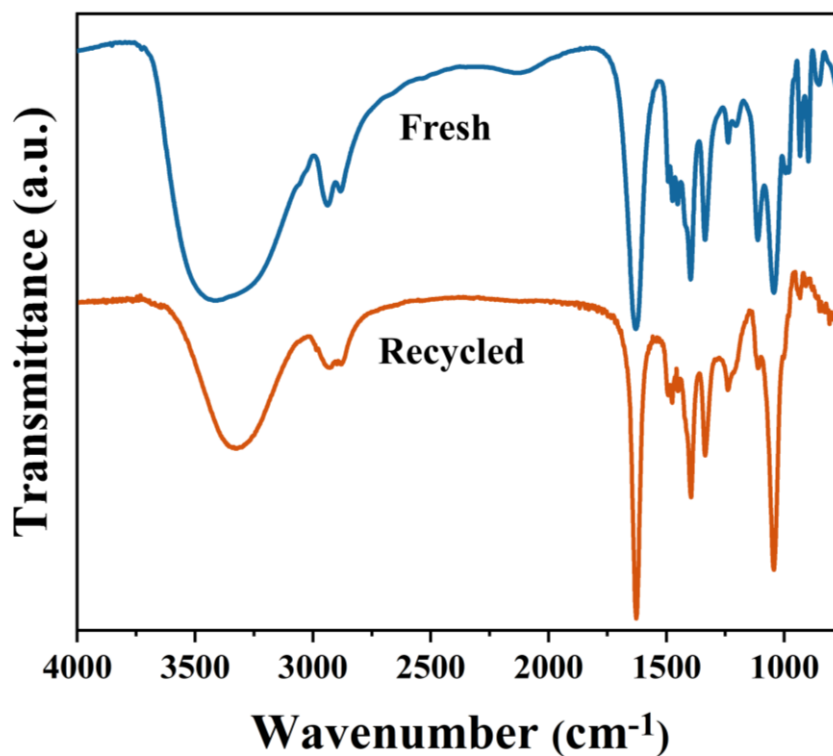

**Fig. S9** FT-IR spectra of fresh and recycled Bet/Gly DESs.

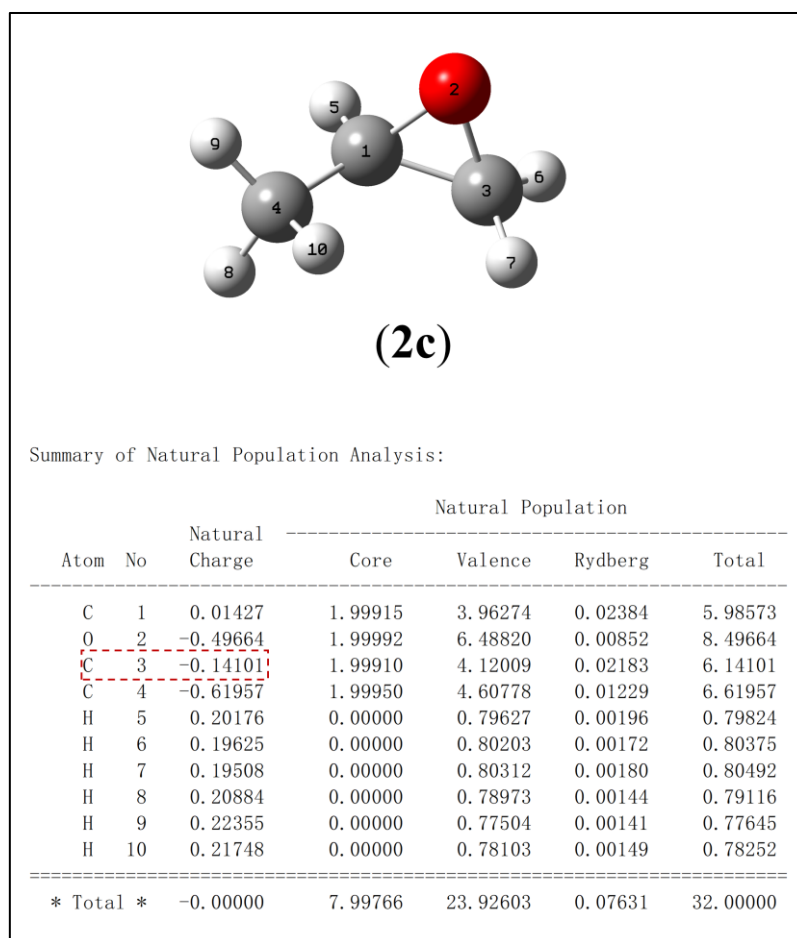

**Fig. S10** The NBO charge distribution of **2c** calculated at the M06-2X/Def2-TZVPP level with Gaussian 09.

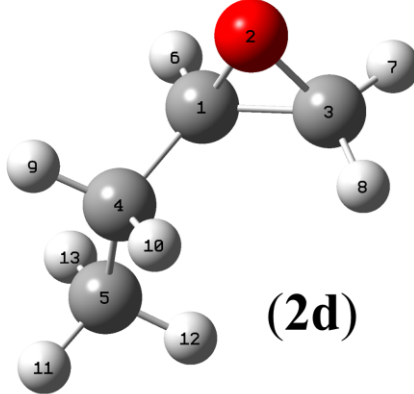

**(2d)**

Summary of Natural Population Analysis:

| Atom      | No | Natural Charge | Natural Population |          |         | Total    |
|-----------|----|----------------|--------------------|----------|---------|----------|
|           |    |                | Core               | Valence  | Rydberg |          |
| C         | 1  | 0.02023        | 1.99908            | 3.95666  | 0.02403 | 5.97977  |
| O         | 2  | -0.49369       | 1.99992            | 6.48542  | 0.00836 | 8.49369  |
| C         | 3  | -0.14180       | 1.99909            | 4.12142  | 0.02129 | 6.14180  |
| C         | 4  | -0.41070       | 1.99948            | 4.39553  | 0.01570 | 6.41070  |
| C         | 5  | -0.60590       | 1.99951            | 4.60064  | 0.00575 | 6.60590  |
| H         | 6  | 0.19766        | 0.00000            | 0.80019  | 0.00215 | 0.80234  |
| H         | 7  | 0.19646        | 0.00000            | 0.80182  | 0.00171 | 0.80354  |
| H         | 8  | 0.19525        | 0.00000            | 0.80292  | 0.00183 | 0.80475  |
| H         | 9  | 0.21409        | 0.00000            | 0.78394  | 0.00197 | 0.78591  |
| H         | 10 | 0.21084        | 0.00000            | 0.78721  | 0.00195 | 0.78916  |
| H         | 11 | 0.21401        | 0.00000            | 0.78453  | 0.00146 | 0.78599  |
| H         | 12 | 0.20133        | 0.00000            | 0.79680  | 0.00188 | 0.79867  |
| H         | 13 | 0.20222        | 0.00000            | 0.79605  | 0.00172 | 0.79778  |
| * Total * |    | -0.00000       | 9.99709            | 29.91313 | 0.08978 | 40.00000 |

**Fig. S11** The NBO charge distribution of **2d** calculated at the M06-2X/Def2-TZVPP level with Gaussian 09.

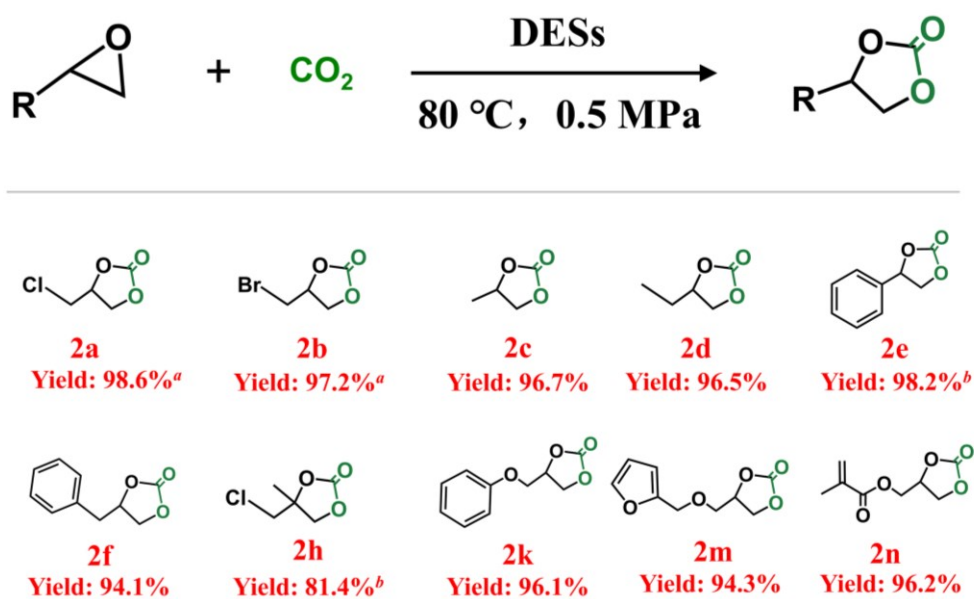

**Scheme S1** The cycloaddition of CO<sub>2</sub> with various epoxides at 80 °C and 0.5 MPa. Isolated yield of purified cyclic carbonate by column chromatography. Reaction conditions: 37.5 mmol epoxide, 80 °C, 0.5 MPa CO<sub>2</sub>, 6 h, 4 mol% Bet/Gly. <sup>a</sup>4 h. <sup>b</sup>12 h, 6 mol% Bet/Gly.

**Table S1.** The comparison of various halide-free catalytic systems for the cycloaddition of CO<sub>2</sub> and epoxides.

| Entry | Catalyst                                               | Epoxide                                                                             | Temp [°C] | Catalyst loading [mol%] | Pressure [MPa] | Time [h] | Carbonate yield [%] | TOF <sup>a</sup> | Ref.             |
|-------|--------------------------------------------------------|-------------------------------------------------------------------------------------|-----------|-------------------------|----------------|----------|---------------------|------------------|------------------|
| 1     | Sq-PhOH-p/t-BuP <sub>2</sub>                           |    | 120       | 2.5                     | 0.1            | 8        | 80.1                | 4.0              | <sup>2</sup>     |
| 2     | [P <sub>4444</sub> ] [IsoNic]                          |    | 120       | 2                       | 2              | 12       | 96.9                | 4.0              | <sup>3</sup>     |
| 3     | N,N'-Phenylenebis(5-tert-butylsalicylideneimine)       |    | 120       | 1                       | 1              | 3.5      | 76                  | 21.7             | <sup>4</sup>     |
| 4     | [TEEDA]                                                |    | 120       | 0.1                     | 1              | 10       | 97                  | 97.0             | <sup>5</sup>     |
| 5     | [N <sub>1888</sub> ][HYD]                              |    | 120       | 10                      | 2              | 6        | 88                  | 1.5              | <sup>6</sup>     |
| 6     | Carbodicarbene                                         |    | 100       | 5                       | 2              | 12       | 92                  | 1.5              | <sup>7</sup>     |
| 7     | [n Bu <sub>4</sub> N] <sub>2</sub> [MoO <sub>4</sub> ] |    | 120       | 2.5                     | 3              | 9        | 99                  | 4.4              | <sup>8</sup>     |
| 8     | PPy · Sac                                              |   | 60        | 10                      | 0.1            | 24       | 90                  | 0.4              | <sup>9</sup>     |
| 9     | (DBUH) <sub>3</sub> NbO <sub>5</sub>                   |  | 130       | 3                       | 3              | 5        | 90                  | 6.1              | <sup>10</sup>    |
| 10    | 1-a-60/b-SBA-15                                        |  | 120       | 0.2                     | 1.5            | 18       | 89                  | 24.7             | <sup>11</sup>    |
| 11    | Bet/Gly                                                |  | 120       | 0.3                     | 1              | 0.5      | 99.1                | <b>645</b>       | <b>This work</b> |

<sup>a</sup>Turnover frequency (TOF) = moles of product/ (moles of catalyst × time).

**Table S2.** The apparent first-order rate constants  $k_{\text{obs}}$  for the cycloaddition at 1 MPa and different temperature.

| T (°C)                                              | 90   | 100  | 110  | 120   | 130   |
|-----------------------------------------------------|------|------|------|-------|-------|
| $10^5 \cdot k_{\text{obs}} \text{ (s}^{-1}\text{)}$ | 0.32 | 2.04 | 8.08 | 20.82 | 52.65 |

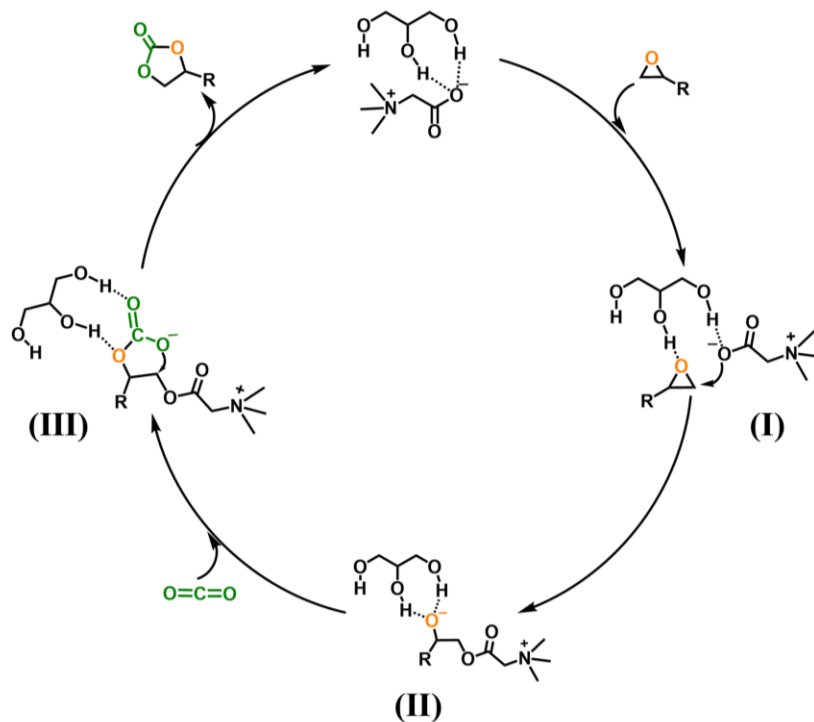

**Scheme S2** The possible catalysis mechanism for the cycloaddition of CO<sub>2</sub> with epoxides catalyzed by Bet/Gly.

## Cartesian Coordinates of the Optimized Geometries

R

|   |          |          |          |
|---|----------|----------|----------|
| N | 0.64994  | -2.34997 | 0.11434  |
| C | 0.3616   | -0.87579 | 0.06591  |
| C | 0.4928   | -2.86088 | -1.27696 |
| C | 2.03822  | -2.61699 | 0.58969  |
| C | -0.34685 | -3.01599 | 1.00503  |
| C | 0.30558  | -0.14117 | 1.42157  |
| O | 0.84132  | -0.63227 | 2.40955  |
| O | -0.31572 | 0.95754  | 1.32361  |
| H | -0.61762 | -0.79319 | -0.41307 |
| H | 1.13852  | -0.4174  | -0.56302 |
| H | 0.67627  | -3.94247 | -1.27873 |
| H | -0.5253  | -2.62596 | -1.61624 |
| H | 1.22947  | -2.34886 | -1.90834 |
| H | 2.12633  | -2.20161 | 1.59843  |
| H | 2.72881  | -2.11666 | -0.10022 |

|   |          |          |          |
|---|----------|----------|----------|
| H | 2.19988  | -3.70245 | 0.5829   |
| H | -1.3475  | -2.67931 | 0.70393  |
| H | -0.23387 | -4.10212 | 0.901    |
| H | -0.14725 | -2.68983 | 2.03068  |
| C | -3.01375 | 1.34128  | -0.25699 |
| C | -3.57747 | -0.96623 | -1.15631 |
| O | -1.72433 | 1.34299  | -0.82133 |
| O | -2.65871 | -0.69934 | 1.01932  |
| O | -2.34351 | -1.1161  | -1.81921 |
| H | -1.94056 | -0.22919 | -1.84802 |
| H | -2.16479 | -0.02851 | 1.51741  |
| H | -1.09532 | 1.18377  | -0.05333 |
| H | -3.0314  | 1.9607   | 0.65935  |
| H | -3.71397 | 1.79974  | -0.97402 |
| H | -3.9103  | -1.96787 | -0.84314 |
| H | -4.34904 | -0.55901 | -1.83713 |
| O | 3.18892  | -0.20491 | -1.30499 |
| C | 3.91723  | 0.6789   | -0.462   |
| C | 3.42275  | 1.11213  | -1.77537 |
| C | 3.25083  | 1.11117  | 0.81317  |
| H | 4.98033  | 0.41709  | -0.39131 |
| H | 3.19022  | 0.28834  | 1.53989  |
| H | 2.23129  | 1.47349  | 0.62074  |
| H | 3.82081  | 1.93043  | 1.27394  |
| H | 2.53903  | 1.75883  | -1.80533 |
| H | 4.10868  | 1.1855   | -2.62488 |
| C | -3.49847 | -0.07062 | 0.07643  |
| H | -4.52745 | 0.02058  | 0.47855  |
| C | -0.18563 | 3.41022  | 0.13309  |
| O | 0.74073  | 3.09125  | -0.48645 |
| O | -1.0932  | 3.7858   | 0.74027  |

## Int1

|   |          |          |          |
|---|----------|----------|----------|
| N | -2.08399 | 1.82582  | -0.07369 |
| C | -2.49404 | 0.49488  | 0.48151  |
| C | -2.14049 | 2.80584  | 1.04853  |
| C | -0.67058 | 1.78928  | -0.59207 |
| C | -3.00741 | 2.26099  | -1.1614  |
| C | -2.36237 | -0.66122 | -0.498   |
| O | -2.50918 | -1.80823 | 0.15898  |
| O | -2.25568 | -0.54122 | -1.68776 |
| H | -3.53411 | 0.58071  | 0.83074  |
| H | -1.82911 | 0.27294  | 1.32174  |

|   |          |          |          |
|---|----------|----------|----------|
| H | -1.85799 | 3.79204  | 0.66288  |
| H | -3.16186 | 2.83424  | 1.44665  |
| H | -1.4343  | 2.48016  | 1.8201   |
| H | -0.41812 | 2.81212  | -0.89827 |
| H | -0.60016 | 1.09774  | -1.43935 |
| H | -0.00746 | 1.44408  | 0.21105  |
| H | -4.02669 | 2.3069   | -0.75798 |
| H | -2.69177 | 3.25518  | -1.49886 |
| H | -2.94286 | 1.53424  | -1.97583 |
| C | 3.96444  | 1.04189  | -0.82999 |
| C | 2.17929  | -0.3218  | -1.99588 |
| O | 4.20703  | 1.88027  | 0.26557  |
| O | 2.06197  | 0.33167  | 0.34917  |
| O | 0.81116  | -0.50122 | -2.2298  |
| H | 0.39571  | -0.79148 | -1.37591 |
| H | 1.27966  | -0.31928 | 0.29737  |
| H | 3.66729  | 1.50534  | 0.97598  |
| H | 4.31757  | 1.55122  | -1.73992 |
| H | 4.51742  | 0.08484  | -0.73931 |
| H | 2.64828  | -0.01159 | -2.9449  |
| H | 2.66914  | -1.26653 | -1.68162 |
| O | -0.04817 | -1.04917 | 0.22632  |
| C | -0.22525 | -2.40226 | 0.43832  |
| C | -1.55535 | -2.81519 | -0.2138  |
| C | 0.92201  | -3.24325 | -0.1158  |
| H | -0.32228 | -2.62583 | 1.5253   |
| H | 0.75955  | -4.32192 | 0.03431  |
| H | 1.85511  | -2.95829 | 0.391    |
| H | 1.03781  | -3.04613 | -1.19363 |
| H | -1.94475 | -3.7726  | 0.15371  |
| H | -1.46973 | -2.83797 | -1.31112 |
| C | 2.47754  | 0.73016  | -0.93557 |
| H | 1.95461  | 1.66648  | -1.23101 |
| C | 0.68917  | -0.1268  | 2.65382  |
| O | 0.00177  | 0.81039  | 2.58251  |
| O | 1.36427  | -1.0428  | 2.82933  |

## TS1

|   |          |          |          |
|---|----------|----------|----------|
| N | -3.84884 | -0.09014 | 0.27215  |
| C | -3.46865 | -1.15799 | -0.72578 |
| C | -5.17251 | -0.44778 | 0.84762  |
| C | -2.82335 | -0.0303  | 1.36525  |
| C | -3.94119 | 1.25709  | -0.37913 |

|   |          |          |          |
|---|----------|----------|----------|
| C | -1.97998 | -1.02386 | -1.12366 |
| O | -1.2604  | -1.96499 | -0.68949 |
| O | -1.66023 | -0.02163 | -1.7539  |
| H | -4.12012 | -1.03243 | -1.60032 |
| H | -3.64374 | -2.12659 | -0.24364 |
| H | -5.49033 | 0.34853  | 1.53077  |
| H | -5.89673 | -0.55276 | 0.03122  |
| H | -5.07881 | -1.3956  | 1.39014  |
| H | -3.24052 | 0.55967  | 2.18996  |
| H | -1.92786 | 0.46994  | 0.96988  |
| H | -2.59671 | -1.05325 | 1.68839  |
| H | -4.68322 | 1.19747  | -1.18384 |
| H | -4.26316 | 1.97231  | 0.38739  |
| H | -2.95365 | 1.53012  | -0.76643 |
| C | 2.66313  | 3.36634  | 0.22034  |
| C | 0.1627   | 2.98446  | 0.12642  |
| O | 3.90832  | 2.73554  | 0.28719  |
| O | 1.70512  | 1.46424  | -0.84693 |
| O | -0.83911 | 2.01101  | -0.06086 |
| H | -0.53243 | 1.43001  | -0.7821  |
| H | 1.98272  | 0.5528   | -0.47784 |
| H | 3.8613   | 1.9965   | -0.33582 |
| H | 2.5807   | 4.04799  | 1.08251  |
| H | 2.56182  | 3.97449  | -0.70175 |
| H | -0.07689 | 3.54893  | 1.04045  |
| H | 0.16787  | 3.69545  | -0.72122 |
| O | 2.1134   | -0.78777 | 0.19541  |
| C | 0.84845  | -1.00783 | 0.7268   |
| C | 0.57126  | -1.50824 | -0.61781 |
| C | 0.7972   | -1.99057 | 1.87581  |
| H | 0.30423  | -0.07228 | 0.9698   |
| H | -0.24187 | -2.25199 | 2.12895  |
| H | 1.28202  | -1.55352 | 2.76062  |
| H | 1.33824  | -2.90657 | 1.60145  |
| H | 0.92894  | -2.51198 | -0.84349 |
| H | 0.50005  | -0.77494 | -1.4179  |
| C | 1.53924  | 2.33843  | 0.23466  |
| H | 1.60765  | 1.77451  | 1.18636  |
| C | 3.95263  | -2.44205 | -0.17903 |
| O | 4.73713  | -1.60419 | -0.30803 |
| O | 3.25561  | -3.36496 | -0.0756  |



**Int2**

|   |          |          |          |
|---|----------|----------|----------|
| N | -2.9069  | -0.57083 | -0.1253  |
| C | -1.81658 | -1.59304 | -0.22368 |
| C | -3.78661 | -0.9972  | 1.00026  |
| C | -2.37465 | 0.80702  | 0.20113  |
| C | -3.68233 | -0.51554 | -1.39464 |
| C | -0.66822 | -1.22756 | -1.15264 |
| O | 0.25569  | -2.15565 | -1.02844 |
| O | -0.62628 | -0.26285 | -1.86929 |
| H | -2.26556 | -2.53728 | -0.56545 |
| H | -1.38835 | -1.77512 | 0.77766  |
| H | -4.63933 | -0.31128 | 1.05694  |
| H | -4.13125 | -2.02244 | 0.81958  |
| H | -3.19581 | -0.95333 | 1.92335  |
| H | -3.22157 | 1.43102  | 0.50616  |
| H | -1.90346 | 1.21715  | -0.69273 |
| H | -1.63257 | 0.70015  | 1.00469  |
| H | -4.14806 | -1.49305 | -1.57138 |
| H | -4.45284 | 0.25823  | -1.2971  |
| H | -2.99035 | -0.26192 | -2.20492 |
| C | -0.19179 | 3.44278  | -0.35507 |
| C | 2.03376  | 2.38612  | -1.00406 |
| O | -1.2129  | 3.37628  | 0.61129  |
| O | 1.1488   | 2.25839  | 1.2105   |
| O | 2.81095  | 1.22613  | -0.86321 |
| H | 2.67678  | 0.91337  | 0.04699  |
| H | 0.81826  | 1.39776  | 1.58602  |
| H | -0.73708 | 3.17455  | 1.43341  |
| H | -0.65512 | 3.38516  | -1.35313 |
| H | 0.3517   | 4.40535  | -0.29097 |
| H | 1.76071  | 2.49177  | -2.06694 |
| H | 2.60002  | 3.28894  | -0.70371 |
| O | 1.79673  | -0.80314 | 0.87431  |
| C | 2.3322   | -1.86645 | 0.10681  |
| C | 1.64323  | -1.84673 | -1.25357 |
| C | 3.83198  | -1.67559 | -0.03098 |
| H | 2.09543  | -2.81442 | 0.61202  |
| H | 4.27963  | -2.51955 | -0.57476 |
| H | 4.2843   | -1.62758 | 0.96804  |
| H | 4.05805  | -0.74372 | -0.56823 |
| H | 2.04239  | -2.61858 | -1.92422 |
| H | 1.73802  | -0.84807 | -1.70395 |
| C | 0.78577  | 2.29121  | -0.14603 |
| H | 0.28345  | 1.34533  | -0.41151 |
| C | 0.64068  | -1.04798 | 1.63404  |

|   |         |          |         |
|---|---------|----------|---------|
| O | 0.03434 | 0.01245  | 1.91746 |
| O | 0.32218 | -2.20523 | 1.87011 |

**TS2**

|   |          |          |          |
|---|----------|----------|----------|
| N | -2.77298 | -0.17525 | -0.14384 |
| C | -1.89646 | -1.34872 | -0.45205 |
| C | -3.58684 | -0.54336 | 1.05089  |
| C | -1.96024 | 1.04933  | 0.20124  |
| C | -3.66338 | 0.12798  | -1.29714 |
| C | -0.82441 | -1.10552 | -1.50015 |
| O | -0.13771 | -2.22948 | -1.65468 |
| O | -0.68645 | -0.09104 | -2.12679 |
| H | -2.53681 | -2.18939 | -0.75559 |
| H | -1.35153 | -1.60033 | 0.46524  |
| H | -4.29452 | 0.26861  | 1.25346  |
| H | -4.1275  | -1.47422 | 0.84101  |
| H | -2.89899 | -0.67843 | 1.89376  |
| H | -2.59862 | 1.73166  | 0.77274  |
| H | -1.6362  | 1.5243   | -0.72459 |
| H | -1.08337 | 0.73865  | 0.78411  |
| H | -4.31664 | -0.73434 | -1.47911 |
| H | -4.26383 | 1.01092  | -1.04745 |
| H | -3.03286 | 0.33051  | -2.16934 |
| C | 0.55326  | 3.65032  | 0.10363  |
| C | 2.4293   | 2.2507   | -0.92485 |
| O | -0.58436 | 3.53364  | 0.92492  |
| O | 1.13351  | 1.55869  | 0.98434  |
| O | 2.73364  | 0.95228  | -1.36852 |
| H | 2.30339  | 0.33584  | -0.75635 |
| H | 1.17075  | 0.57188  | 0.78748  |
| H | -0.31688 | 2.87081  | 1.58122  |
| H | 0.26852  | 4.19296  | -0.80973 |
| H | 1.34978  | 4.22965  | 0.60991  |
| H | 2.41863  | 2.9196   | -1.80153 |
| H | 3.19116  | 2.62514  | -0.21504 |
| O | 0.94421  | -0.90935 | 0.38635  |
| C | 1.65669  | -1.97972 | -0.1266  |
| C | 1.2982   | -2.10964 | -1.61108 |
| C | 3.1716   | -1.9061  | 0.07796  |
| H | 1.31643  | -2.93044 | 0.34667  |
| H | 3.66169  | -2.82647 | -0.27525 |
| H | 3.37505  | -1.79604 | 1.151    |

|   |          |          |          |
|---|----------|----------|----------|
| H | 3.62027  | -1.05384 | -0.45249 |
| H | 1.69829  | -3.01743 | -2.07971 |
| H | 1.60662  | -1.21685 | -2.17769 |
| C | 1.07868  | 2.26234  | -0.23312 |
| H | 0.37931  | 1.76502  | -0.93281 |
| C | 0.43892  | -1.28861 | 2.47984  |
| O | -0.65067 | -0.84687 | 2.47003  |
| O | 1.41491  | -1.8085  | 2.83255  |

### Int3

|   |          |          |          |
|---|----------|----------|----------|
| N | 3.00006  | -0.91118 | -0.25955 |
| C | 2.72257  | 0.5619   | -0.18255 |
| C | 3.56557  | -1.29412 | 1.07153  |
| C | 1.75571  | -1.74444 | -0.46519 |
| C | 3.96238  | -1.18915 | -1.35716 |
| C | 1.66647  | 1.06111  | -1.15539 |
| O | 1.24579  | 2.24318  | -0.74262 |
| O | 1.29243  | 0.47689  | -2.13481 |
| H | 3.6674   | 1.09599  | -0.36241 |
| H | 2.39116  | 0.82122  | 0.83441  |
| H | 3.89194  | -2.33921 | 1.02263  |
| H | 4.41352  | -0.63745 | 1.30146  |
| H | 2.75835  | -1.16606 | 1.8085   |
| H | 1.99816  | -2.77218 | -0.17369 |
| H | 1.4555   | -1.68802 | -1.512   |
| H | 0.97517  | -1.35945 | 0.19737  |
| H | 4.91383  | -0.68863 | -1.13932 |
| H | 4.1123   | -2.27303 | -1.42475 |
| H | 3.52894  | -0.80857 | -2.28976 |
| C | -2.03539 | -2.73813 | 0.06702  |
| C | -3.82194 | -1.34161 | -1.07158 |
| O | -0.76328 | -2.73332 | 0.65324  |
| O | -2.78567 | -0.63211 | 0.93116  |
| O | -4.36004 | -0.04847 | -1.12502 |
| H | -4.28814 | 0.27367  | -0.21397 |
| H | -2.04217 | -0.01774 | 1.06439  |
| H | -0.6914  | -1.98742 | 1.27955  |
| H | -1.97938 | -3.34398 | -0.85332 |
| H | -2.78641 | -3.2081  | 0.7313   |
| H | -3.62945 | -1.67989 | -2.10063 |
| H | -4.53577 | -2.05439 | -0.61185 |
| O | -0.67948 | 1.0473   | 0.74802  |
| C | -0.87717 | 2.38636  | 0.33577  |

|   |          |          |          |
|---|----------|----------|----------|
| C | -0.11979 | 2.60486  | -0.97286 |
| C | -2.36552 | 2.62259  | 0.14558  |
| H | -0.45041 | 3.04985  | 1.10187  |
| H | -2.55637 | 3.64096  | -0.22263 |
| H | -2.88614 | 2.5006   | 1.10507  |
| H | -2.78545 | 1.90087  | -0.57192 |
| H | -0.1362  | 3.66049  | -1.27179 |
| H | -0.52959 | 1.98206  | -1.78124 |
| C | -2.529   | -1.34055 | -0.2625  |
| H | -1.74556 | -0.81289 | -0.84122 |
| C | 0.31583  | 0.74112  | 1.73478  |
| O | 0.38945  | -0.48546 | 1.922    |
| O | 0.97298  | 1.67073  | 2.17504  |

### TS3

|   |          |          |          |
|---|----------|----------|----------|
| N | -3.71682 | 0.17882  | 0.18578  |
| C | -3.21221 | -1.16949 | -0.25722 |
| C | -5.10643 | -0.00985 | 0.68722  |
| C | -2.86043 | 0.71755  | 1.29426  |
| C | -3.73974 | 1.17369  | -0.9383  |
| C | -1.71195 | -1.19891 | -0.61619 |
| O | -1.18884 | -2.33065 | -0.3976  |
| O | -1.18446 | -0.18918 | -1.05474 |
| H | -3.80561 | -1.47333 | -1.13129 |
| H | -3.39833 | -1.87596 | 0.56065  |
| H | -5.50877 | 0.96383  | 0.9889   |
| H | -5.71918 | -0.4374  | -0.11504 |
| H | -5.08678 | -0.69092 | 1.54587  |
| H | -3.386   | 1.56952  | 1.74146  |
| H | -1.90888 | 1.06357  | 0.87029  |
| H | -2.72052 | -0.07555 | 2.03932  |
| H | -4.30444 | 0.73829  | -1.7713  |
| H | -4.23837 | 2.07734  | -0.56861 |
| H | -2.71069 | 1.40243  | -1.22663 |
| C | 2.87542  | 2.86644  | 0.33226  |
| C | 0.35589  | 3.24169  | -0.06567 |
| O | 3.81173  | 1.93965  | 0.78845  |
| O | 1.44088  | 1.33003  | -0.82562 |
| O | -0.82092 | 2.50516  | -0.32698 |
| H | -0.50173 | 1.71691  | -0.80963 |
| H | 1.72253  | 0.48088  | -0.4498  |

|   |         |          |          |
|---|---------|----------|----------|
| H | 3.85328 | 1.16142  | 0.20268  |
| H | 2.86764 | 3.70437  | 1.05024  |
| H | 3.1342  | 3.28039  | -0.66301 |
| H | 0.17522 | 3.91239  | 0.78755  |
| H | 0.62907 | 3.86216  | -0.93978 |
| O | 2.11702 | -0.89455 | 0.54761  |
| C | 0.99154 | -1.72519 | 0.71311  |
| C | 0.6434  | -2.3531  | -0.63236 |
| C | 1.22536 | -2.77897 | 1.78071  |
| H | 0.18388 | -1.04437 | 1.01492  |
| H | 0.30916 | -3.36529 | 1.93996  |
| H | 1.51965 | -2.3004  | 2.72361  |
| H | 2.03067 | -3.45035 | 1.45273  |
| H | 0.61628 | -3.43008 | -0.76054 |
| H | 0.60809 | -1.71953 | -1.51509 |
| C | 1.48398 | 2.26284  | 0.22951  |
| H | 1.27194 | 1.75319  | 1.19057  |
| C | 3.03911 | -1.41105 | -0.40056 |
| O | 2.60891 | -2.47103 | -0.92664 |
| O | 4.02591 | -0.73559 | -0.58186 |

#### Int4

|   |          |          |          |
|---|----------|----------|----------|
| N | -4.04125 | 0.2749   | -0.02345 |
| C | -3.53233 | -1.13756 | 0.16847  |
| C | -5.52724 | 0.2248   | -0.09424 |
| C | -3.64648 | 1.15714  | 1.12029  |
| C | -3.5167  | 0.84797  | -1.30291 |
| C | -1.98507 | -1.34279 | 0.16788  |
| O | -1.67047 | -2.52758 | 0.09612  |
| O | -1.27639 | -0.32086 | 0.2542   |
| H | -3.96217 | -1.7367  | -0.63176 |
| H | -3.92963 | -1.48809 | 1.12209  |
| H | -5.91079 | 1.2372   | -0.2043  |
| H | -5.82153 | -0.37793 | -0.95114 |
| H | -5.90739 | -0.22153 | 0.82235  |
| H | -4.08748 | 2.13898  | 0.95455  |
| H | -2.56423 | 1.21976  | 1.1483   |
| H | -4.03946 | 0.71859  | 2.0365   |
| H | -3.78216 | 0.16867  | -2.11086 |
| H | -3.98444 | 1.81951  | -1.45461 |
| H | -2.4395  | 0.95268  | -1.21532 |

|   |          |          |          |
|---|----------|----------|----------|
| C | 2.93466  | 2.934    | 0.00286  |
| C | 0.4296   | 3.00356  | -0.41057 |
| O | 3.95217  | 2.28316  | 0.72512  |
| O | 1.50424  | 1.0117   | 0.20309  |
| O | -0.79721 | 2.37979  | -0.0914  |
| H | -0.62473 | 1.42338  | -0.01091 |
| H | 1.88526  | 0.56279  | 0.96391  |
| H | 4.11286  | 1.41213  | 0.33552  |
| H | 3.00611  | 4.00357  | 0.22967  |
| H | 3.06508  | 2.80299  | -1.08009 |
| H | 0.32862  | 4.07169  | -0.20245 |
| H | 0.65925  | 2.88271  | -1.47837 |
| O | 2.62739  | -1.44986 | 0.74591  |
| C | 1.42279  | -2.19847 | 0.46107  |
| C | 1.217    | -1.91276 | -1.02705 |
| C | 1.63086  | -3.65796 | 0.79097  |
| H | 0.61875  | -1.75645 | 1.04315  |
| H | 0.70174  | -4.19127 | 0.59334  |
| H | 1.89898  | -3.78343 | 1.83909  |
| H | 2.42522  | -4.08327 | 0.1735   |
| H | 0.95254  | -2.79838 | -1.59705 |
| H | 0.4945   | -1.1131  | -1.18365 |
| C | 1.5634   | 2.41647  | 0.40967  |
| H | 1.39144  | 2.63049  | 1.47175  |
| C | 3.21143  | -1.05608 | -0.39915 |
| O | 2.5116   | -1.46322 | -1.45806 |
| O | 4.22247  | -0.42429 | -0.44659 |

**P**

|   |          |          |          |
|---|----------|----------|----------|
| N | -2.64218 | -1.02366 | -0.26273 |
| C | -1.42821 | -0.52844 | 0.47527  |
| C | -3.29063 | 0.11145  | -0.99195 |
| C | -2.16699 | -2.0223  | -1.26236 |
| C | -3.61509 | -1.65409 | 0.67145  |
| C | -1.65523 | 0.64989  | 1.46069  |
| O | -2.79058 | 0.9161   | 1.83533  |
| O | -0.56385 | 1.20336  | 1.77656  |
| H | -0.71008 | -0.23589 | -0.29844 |
| H | -1.00443 | -1.38609 | 1.0173   |
| H | -3.62661 | 0.8388   | -0.24658 |
| H | -2.53526 | 0.5385   | -1.66429 |
| H | -4.13574 | -0.29238 | -1.56315 |

|   |          |          |          |
|---|----------|----------|----------|
| H | -1.66632 | -2.84022 | -0.73065 |
| H | -1.44114 | -1.53067 | -1.92116 |
| H | -3.03111 | -2.39742 | -1.82451 |
| H | -4.47778 | -2.00378 | 0.09094  |
| H | -3.12138 | -2.50322 | 1.15962  |
| H | -3.90132 | -0.89808 | 1.40964  |
| C | -0.05212 | 2.05361  | -1.60512 |
| C | 1.51668  | 3.24661  | -0.05298 |
| O | -0.43201 | 0.8552   | -2.2467  |
| O | 1.27853  | 0.83555  | 0.02898  |
| O | 0.42436  | 3.66337  | 0.71329  |
| H | 0.11428  | 2.94076  | 1.28756  |
| H | 0.59037  | 0.9676   | 0.75029  |
| H | 0.33098  | 0.26815  | -2.36221 |
| H | 0.03696  | 2.87687  | -2.33694 |
| H | -0.85306 | 2.33397  | -0.90096 |
| H | 2.42461  | 3.08499  | 0.56034  |
| H | 1.74118  | 4.05963  | -0.76206 |
| O | 1.33888  | -2.05802 | 0.1847   |
| C | 2.38285  | -1.94617 | 1.16123  |
| C | 3.41453  | -1.06623 | 0.43415  |
| C | 1.84093  | -1.36619 | 2.44733  |
| H | 2.77872  | -2.96117 | 1.32357  |
| H | 1.32572  | -0.4141  | 2.25583  |
| H | 2.66482  | -1.19212 | 3.15432  |
| H | 1.13389  | -2.06314 | 2.9176   |
| H | 3.35832  | -0.02385 | 0.77217  |
| H | 4.43757  | -1.45349 | 0.50317  |
| C | 1.2593   | 1.95271  | -0.82848 |
| H | 2.08787  | 1.80386  | -1.54613 |
| C | 1.73136  | -1.53925 | -0.98392 |
| O | 2.99348  | -1.12126 | -0.92275 |
| O | 1.04493  | -1.50699 | -1.96415 |

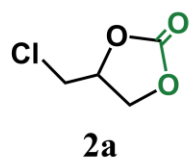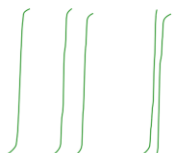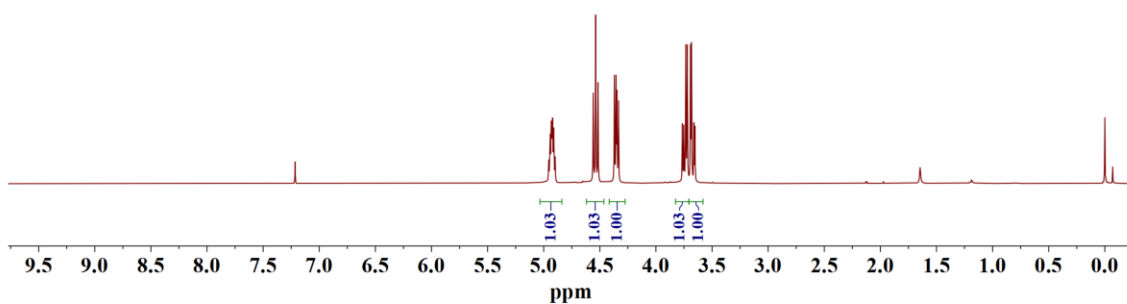

**Fig. S12.**  $^1\text{H}$  NMR spectrum of **2a** (400 MHz,  $\text{CDCl}_3$ , 298 K).

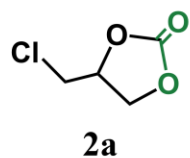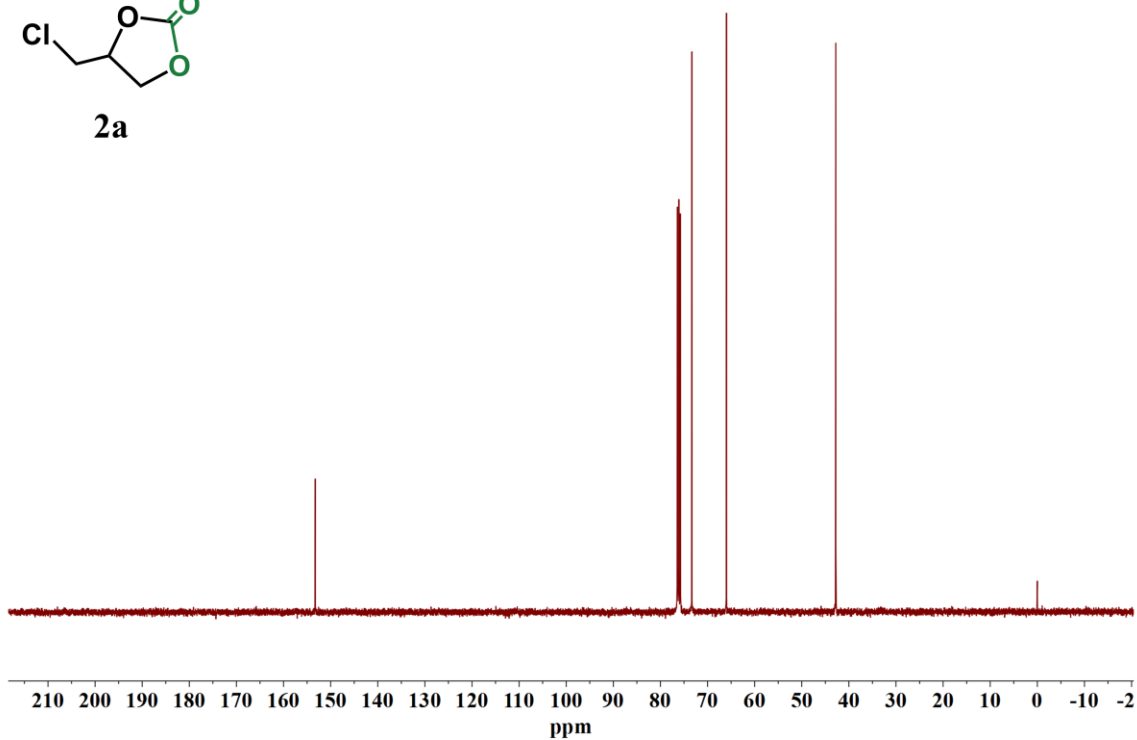

**Fig. S13.**  $^{13}\text{C}$  NMR spectrum of **2a** (126 MHz,  $\text{CDCl}_3$ , 298 K).



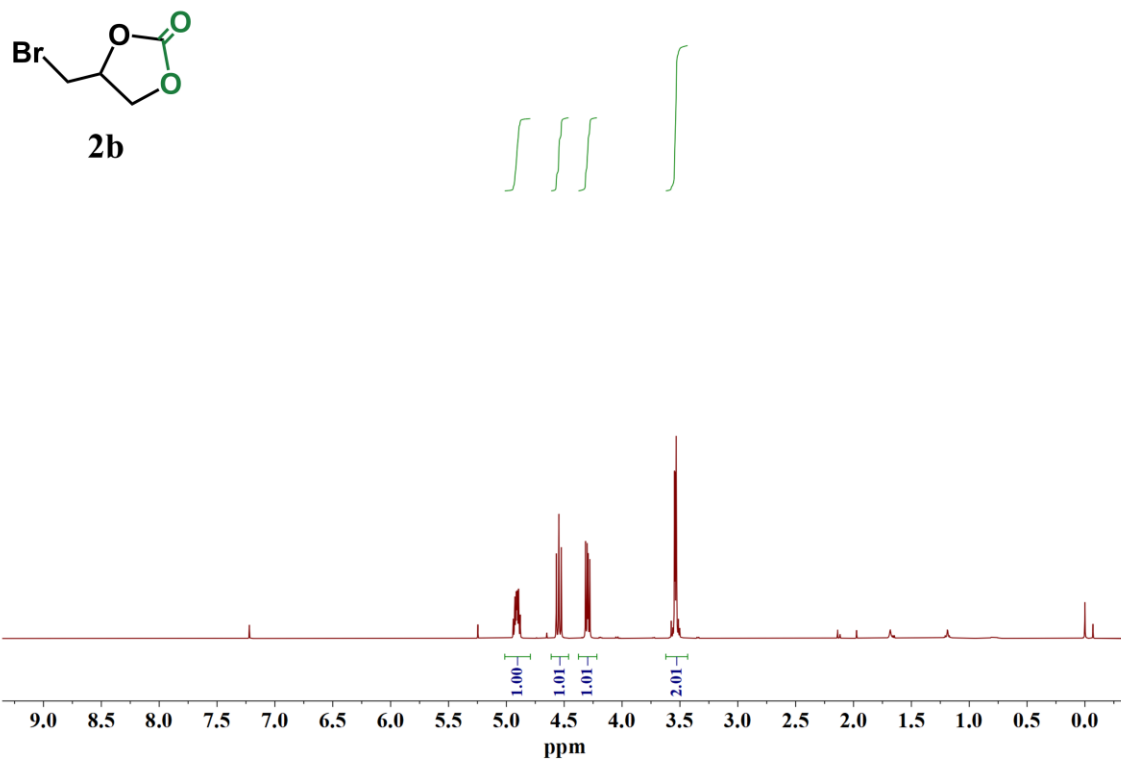

**Fig. S14.**  $^1\text{H}$  NMR spectrum of **2b** (400 MHz,  $\text{CDCl}_3$ , 298 K).

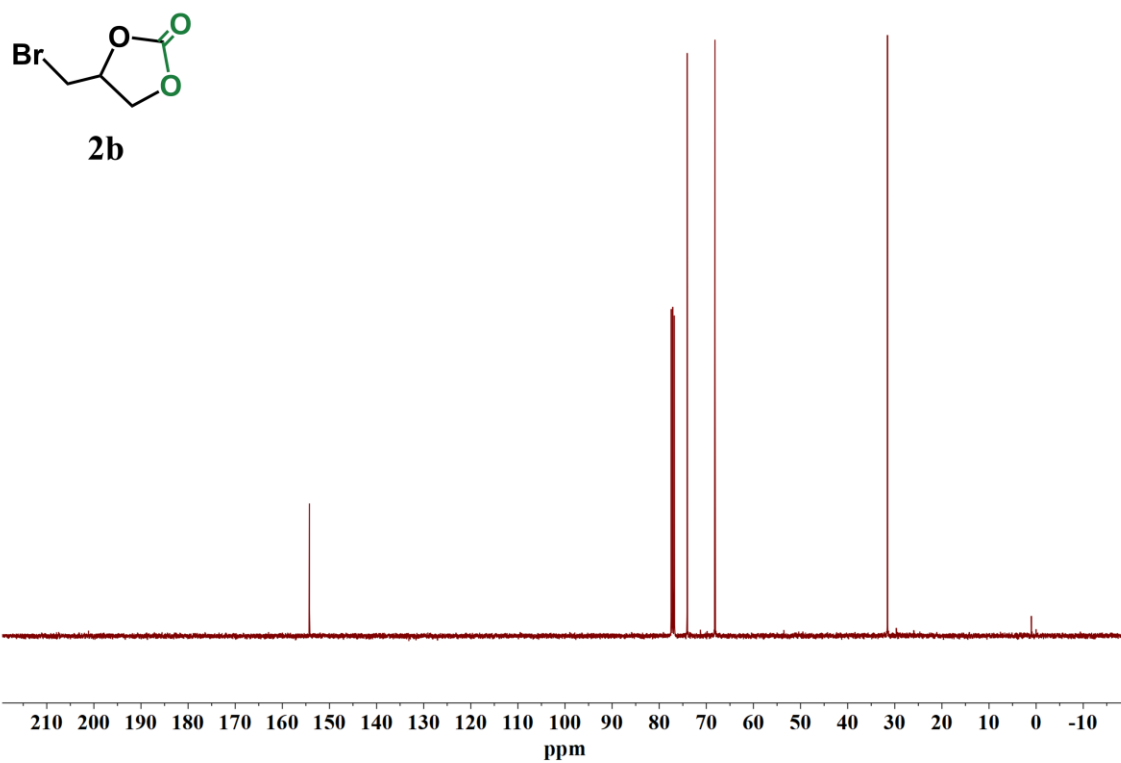

**Fig. S15.**  $^{13}\text{C}$  NMR spectrum of **2b** (126 MHz,  $\text{CDCl}_3$ , 298 K).

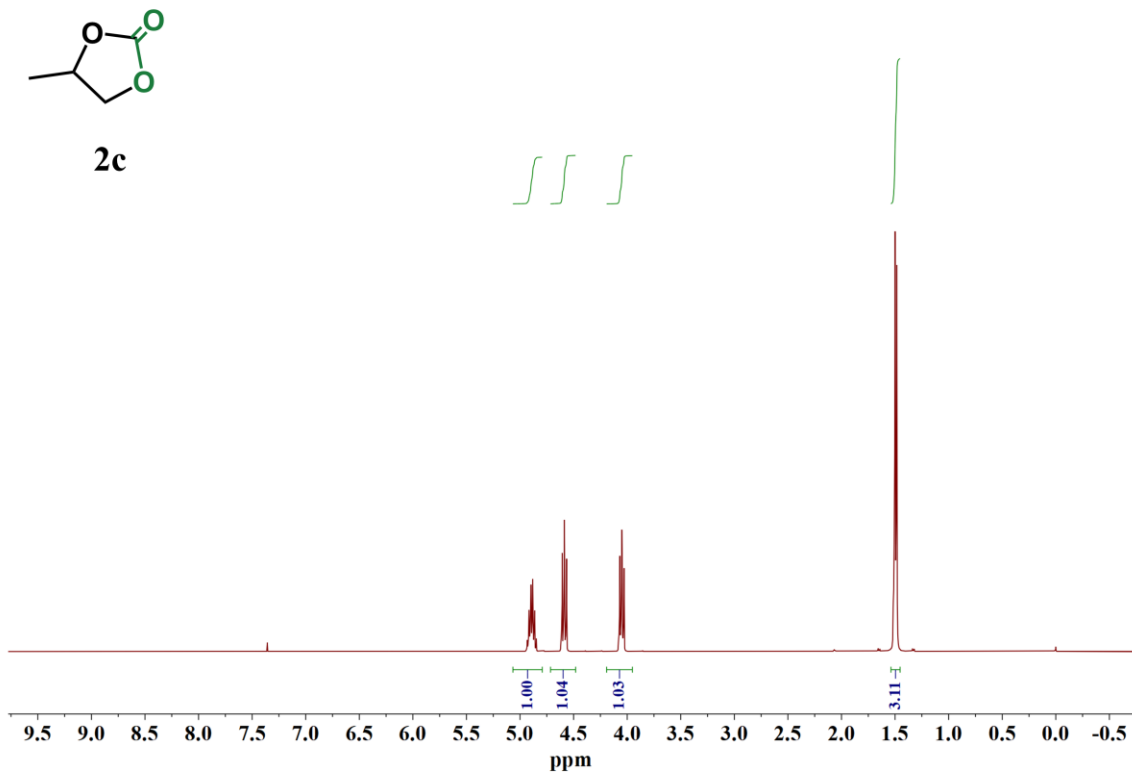

**Fig. S16.** <sup>1</sup>H NMR spectrum of **2c** (400 MHz, CDCl<sub>3</sub>, 298 K).

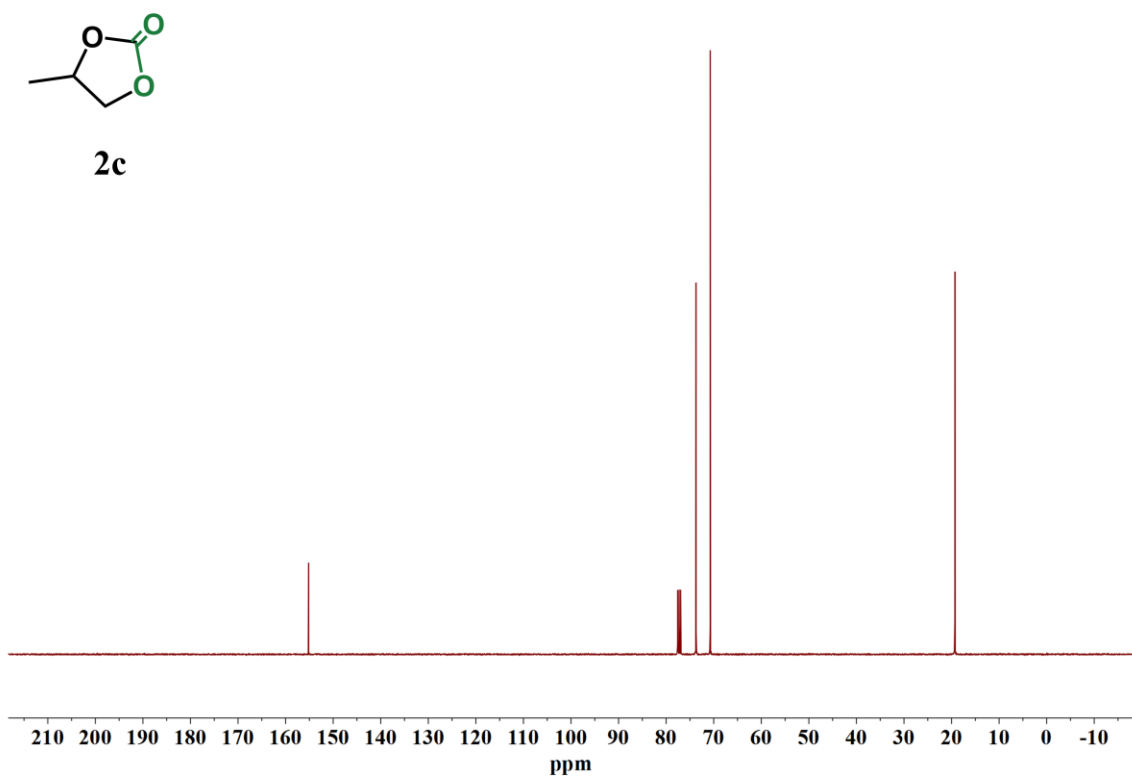

**Fig. S17.** <sup>13</sup>C NMR spectrum of **2c** (126 MHz, CDCl<sub>3</sub>, 298 K).

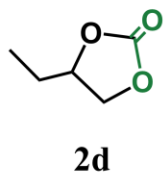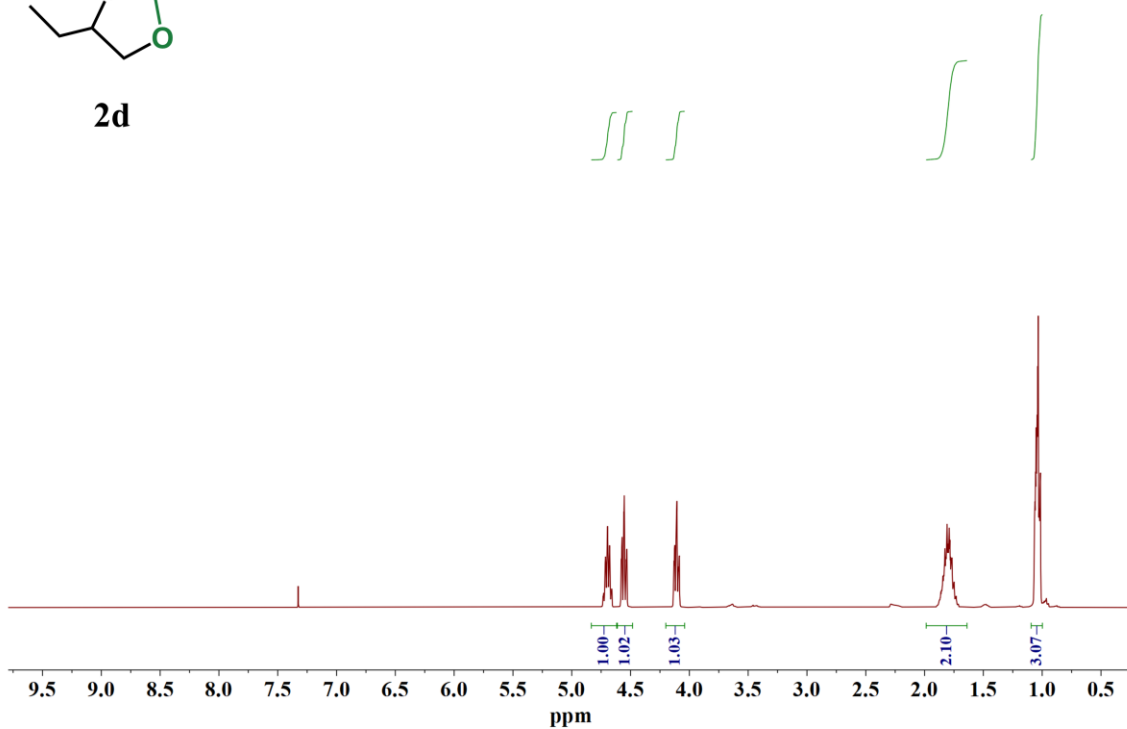

**Fig. S18.** <sup>1</sup>H NMR spectrum of **2d** (400 MHz, CDCl<sub>3</sub>, 298 K).

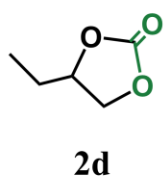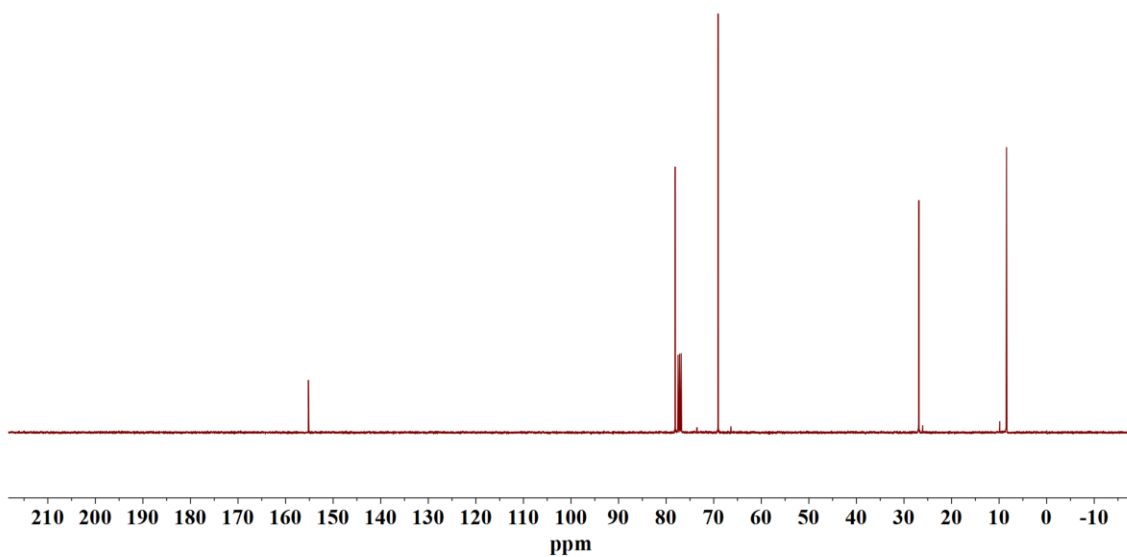

**Fig. S19.** <sup>13</sup>C NMR spectrum of **2d** (126 MHz, CDCl<sub>3</sub>, 298 K).

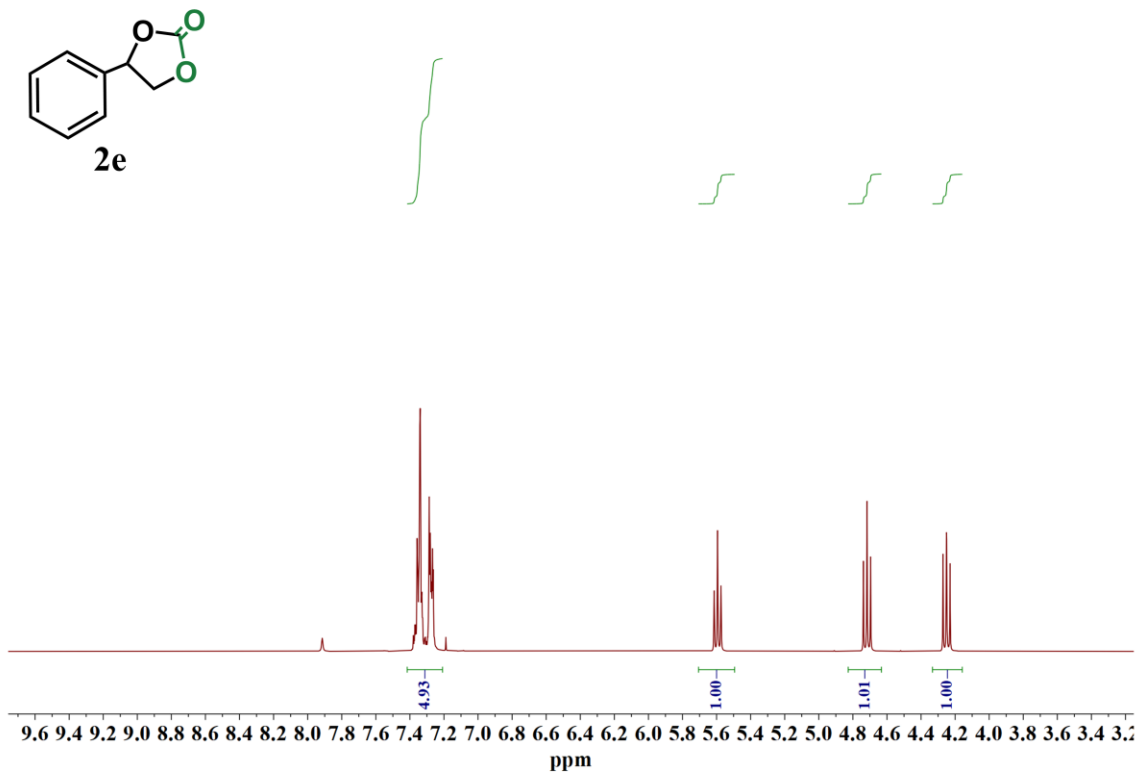

**Fig. S20.** <sup>1</sup>H NMR spectrum of **2e** (400 MHz, CDCl<sub>3</sub>, 298 K).

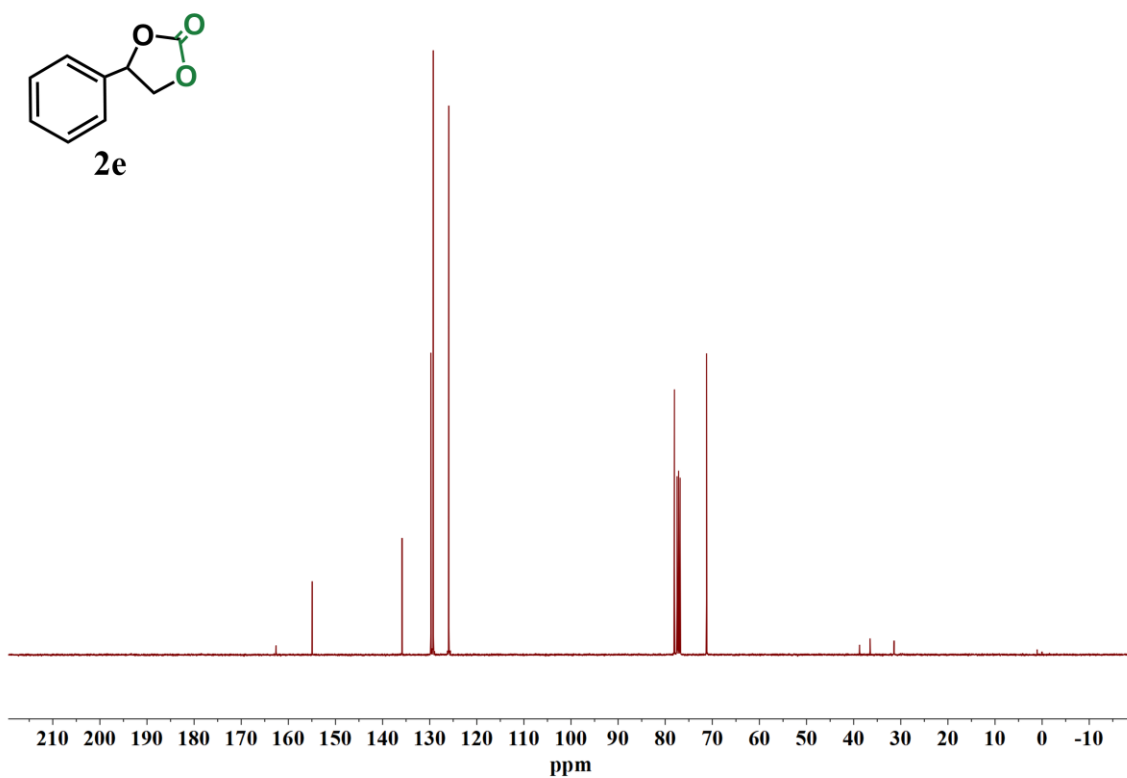

**Fig. S21.** <sup>13</sup>C NMR spectrum of **2e** (126 MHz, CDCl<sub>3</sub>, 298 K).

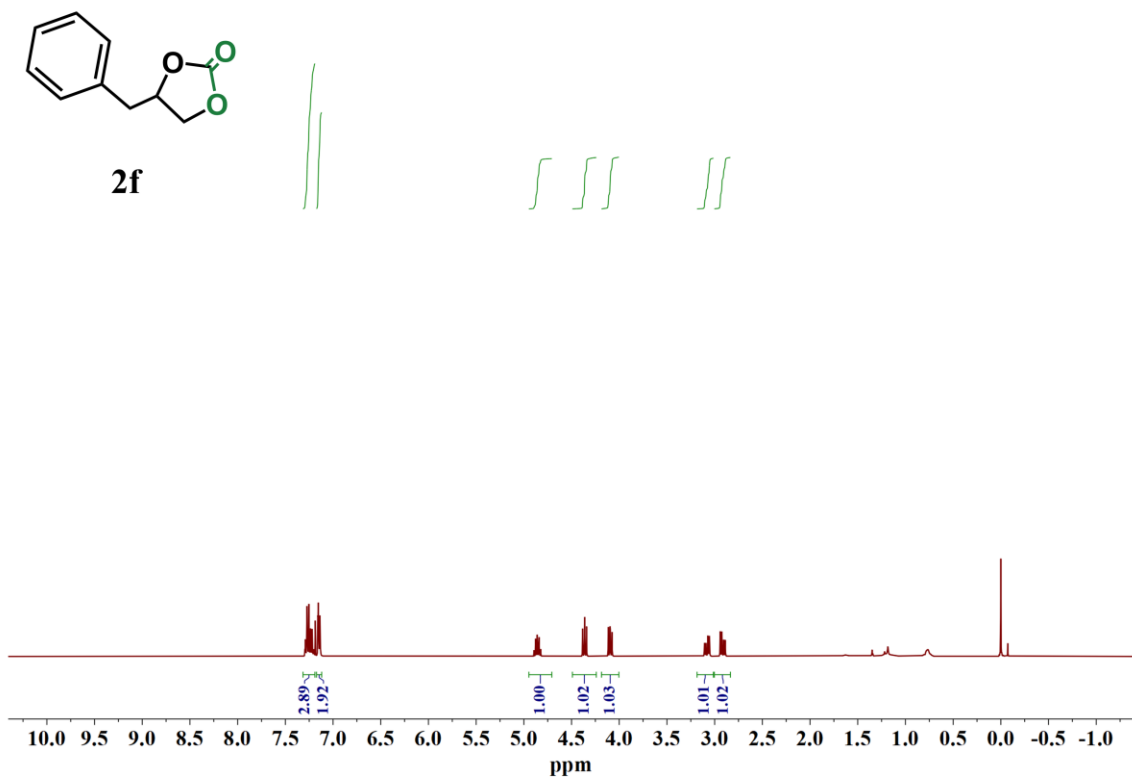

**Fig. S22.**  $^1\text{H}$  NMR spectrum of **2f** (400 MHz,  $\text{CDCl}_3$ , 298 K).

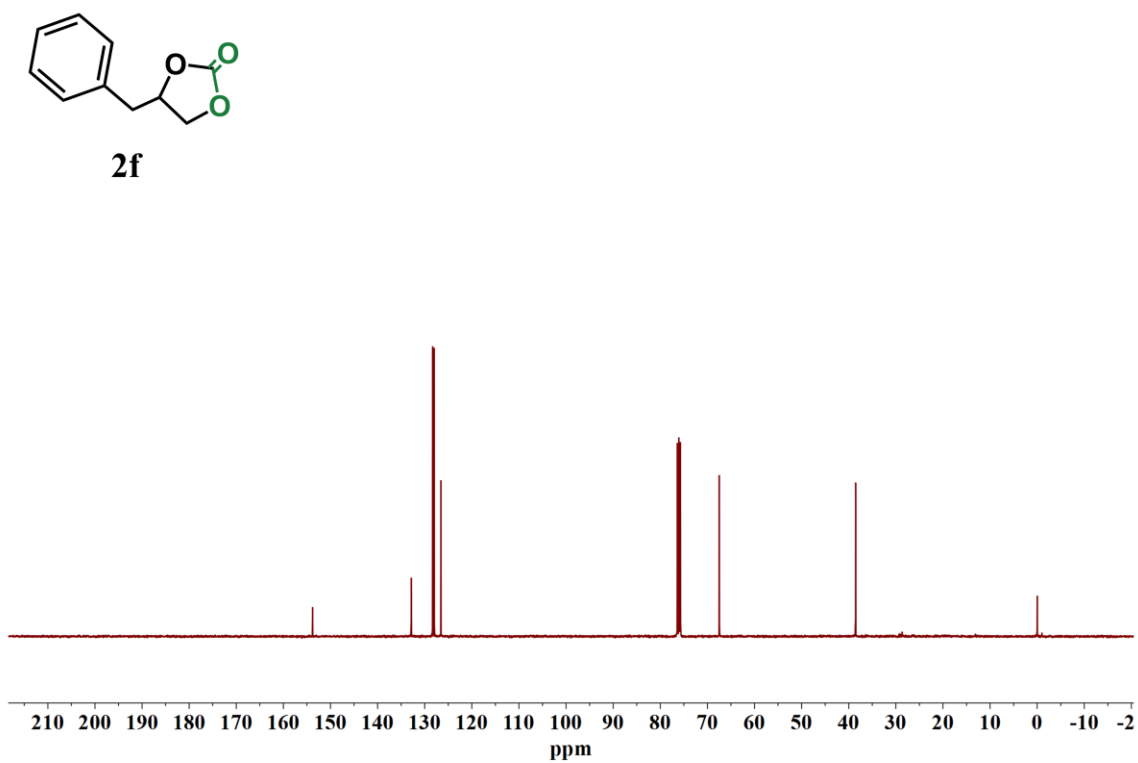

**Fig. S23.**  $^{13}\text{C}$  NMR spectrum of **2f** (126 MHz,  $\text{CDCl}_3$ , 298 K).

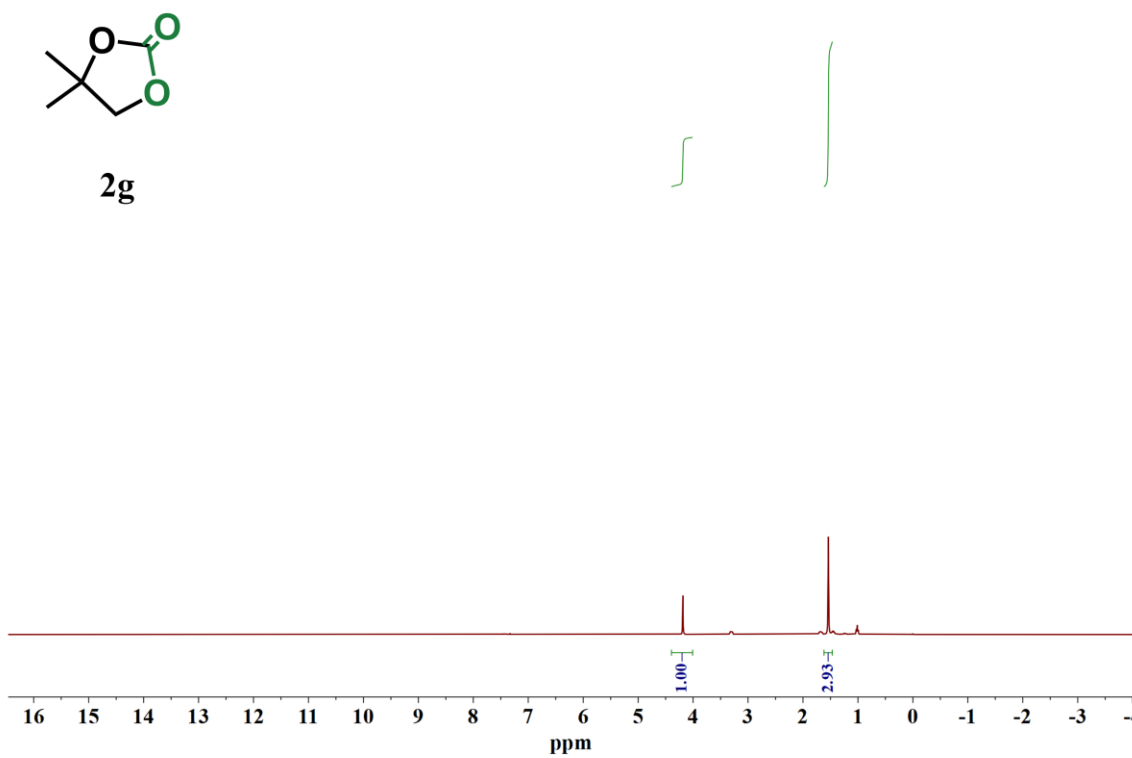

**Fig. S24.**  $^1\text{H}$  NMR spectrum of **2g** (400 MHz,  $\text{CDCl}_3$ , 298 K).

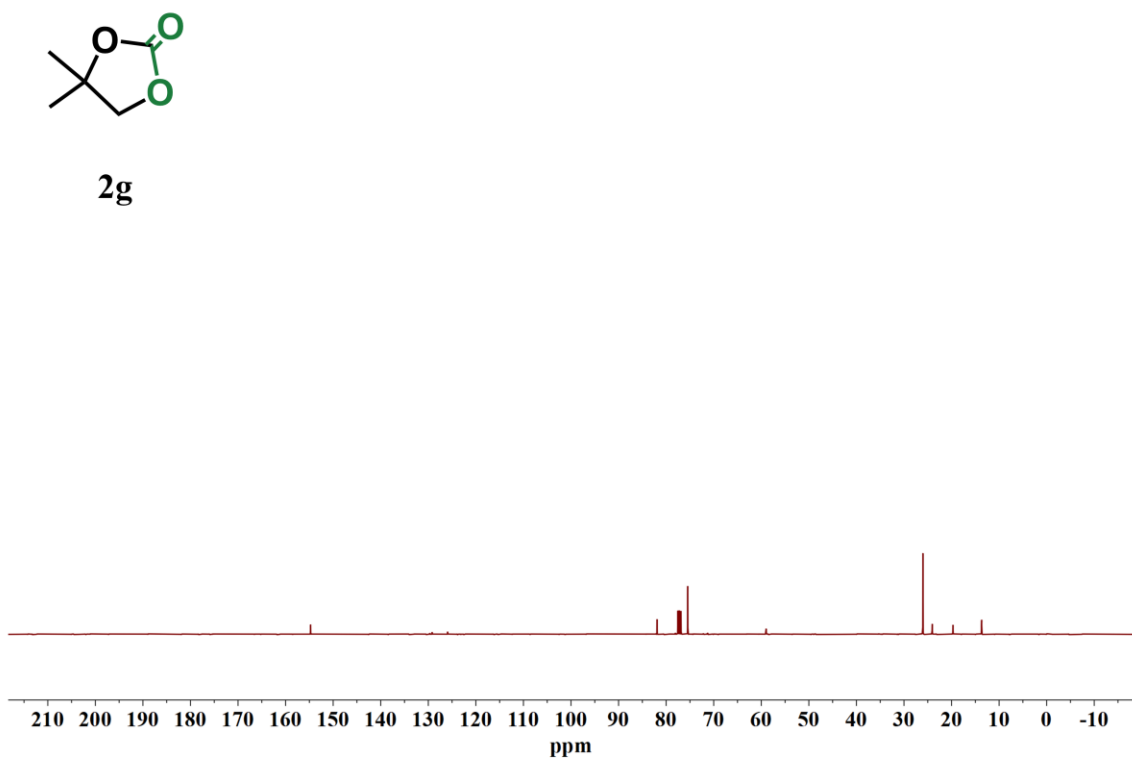

**Fig. S25.**  $^{13}\text{C}$  NMR spectrum of **2g** (126 MHz,  $\text{CDCl}_3$ , 298 K).

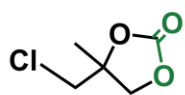

**2h**

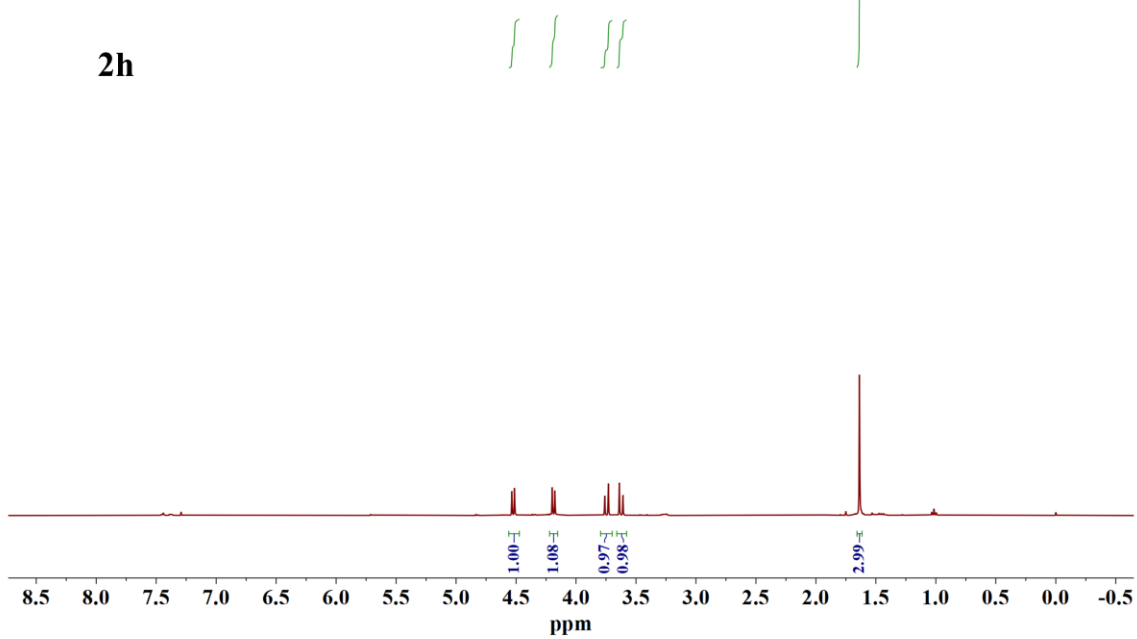

**Fig. S26.** <sup>1</sup>H NMR spectrum of **2h** (400 MHz, CDCl<sub>3</sub>, 298 K).

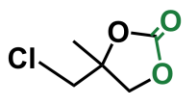

**2h**

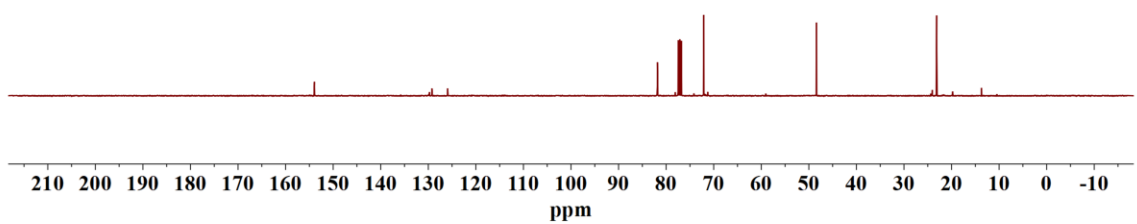

**Fig. S27.** <sup>13</sup>C NMR spectrum of **2h** (126 MHz, CDCl<sub>3</sub>, 298 K).

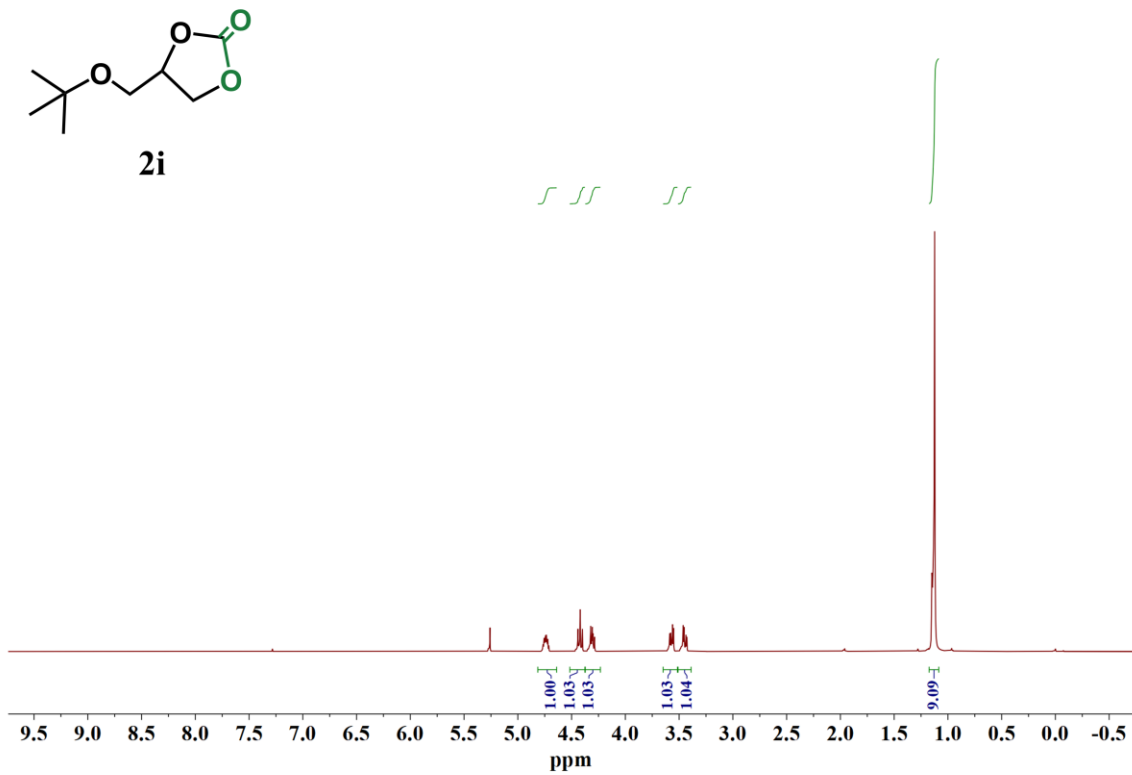

**Fig. S28.**  $^1\text{H}$  NMR spectrum of **2i** (400 MHz,  $\text{CDCl}_3$ , 298 K).

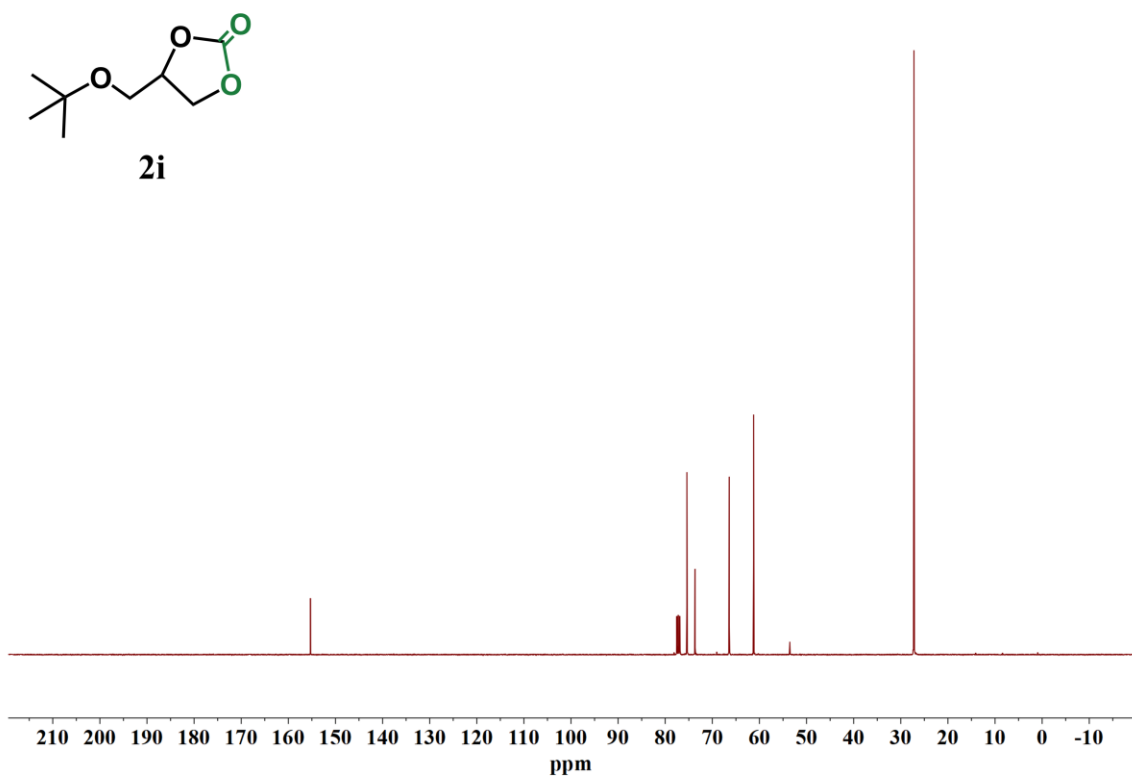

**Fig. S29.**  $^{13}\text{C}$  NMR spectrum of **2i** (126 MHz,  $\text{CDCl}_3$ , 298 K).



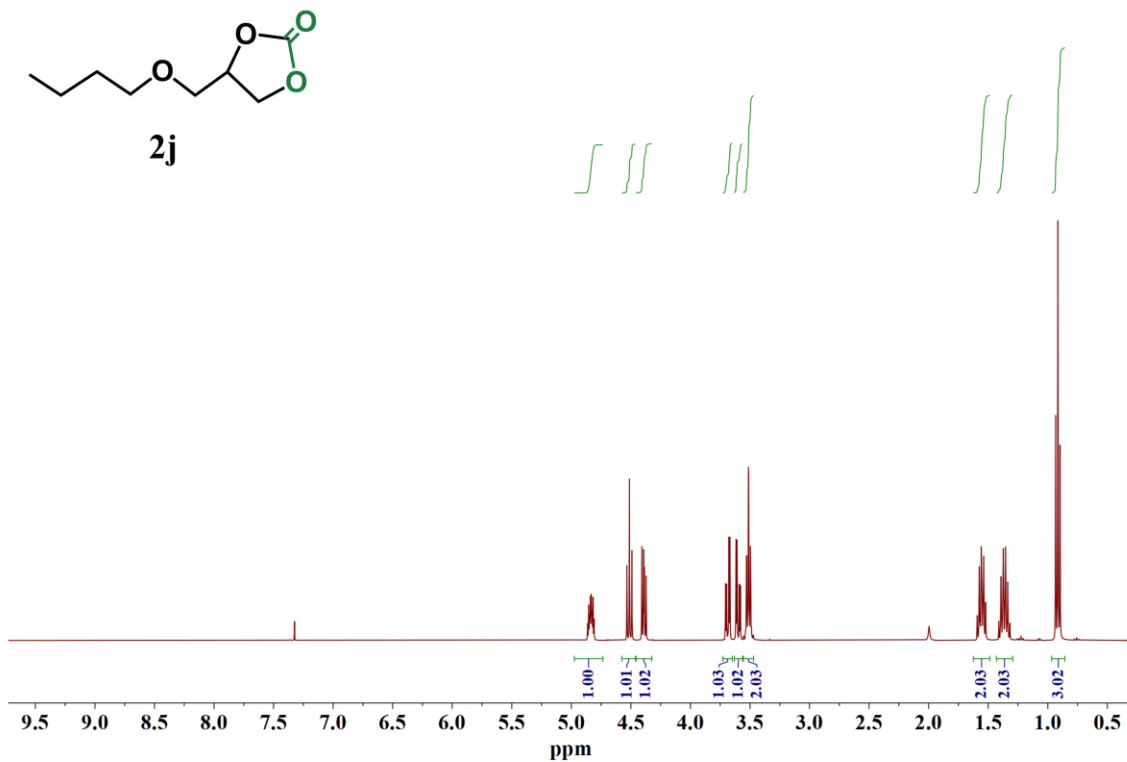

**Fig. S30.**  $^1\text{H}$  NMR spectrum of **2j** (400 MHz,  $\text{CDCl}_3$ , 298 K).

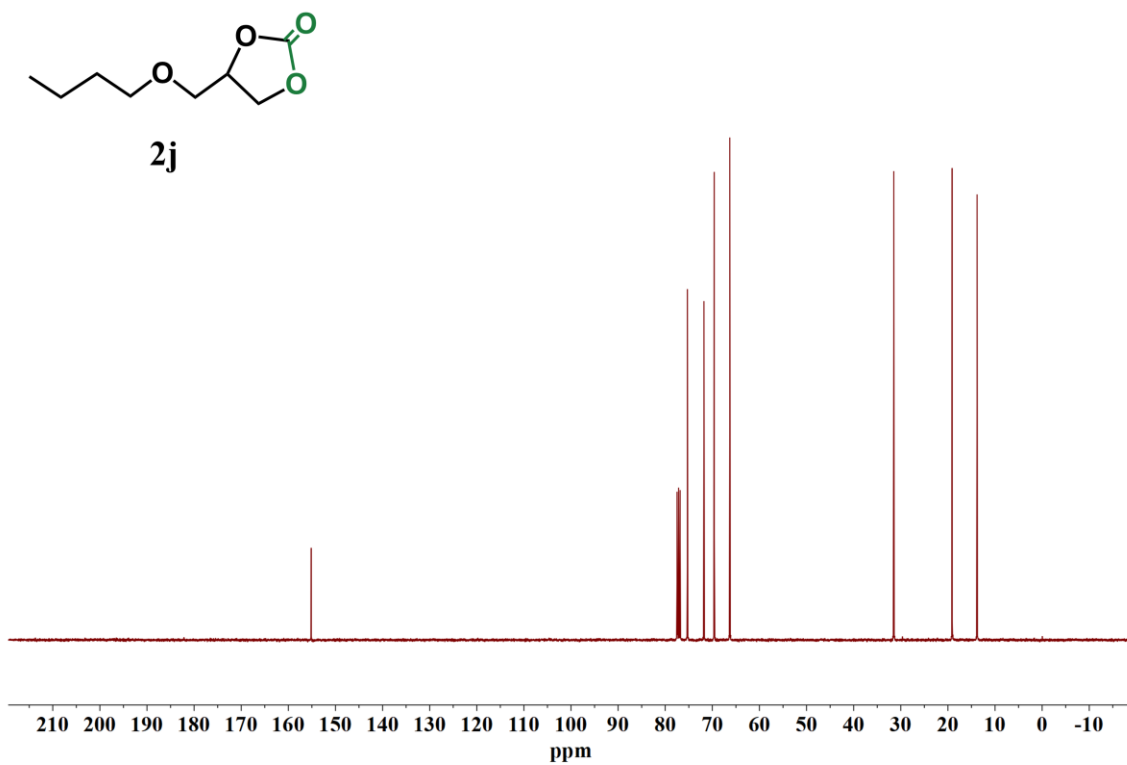

**Fig. S31.**  $^{13}\text{C}$  NMR spectrum of **2j** (126 MHz,  $\text{CDCl}_3$ , 298 K).

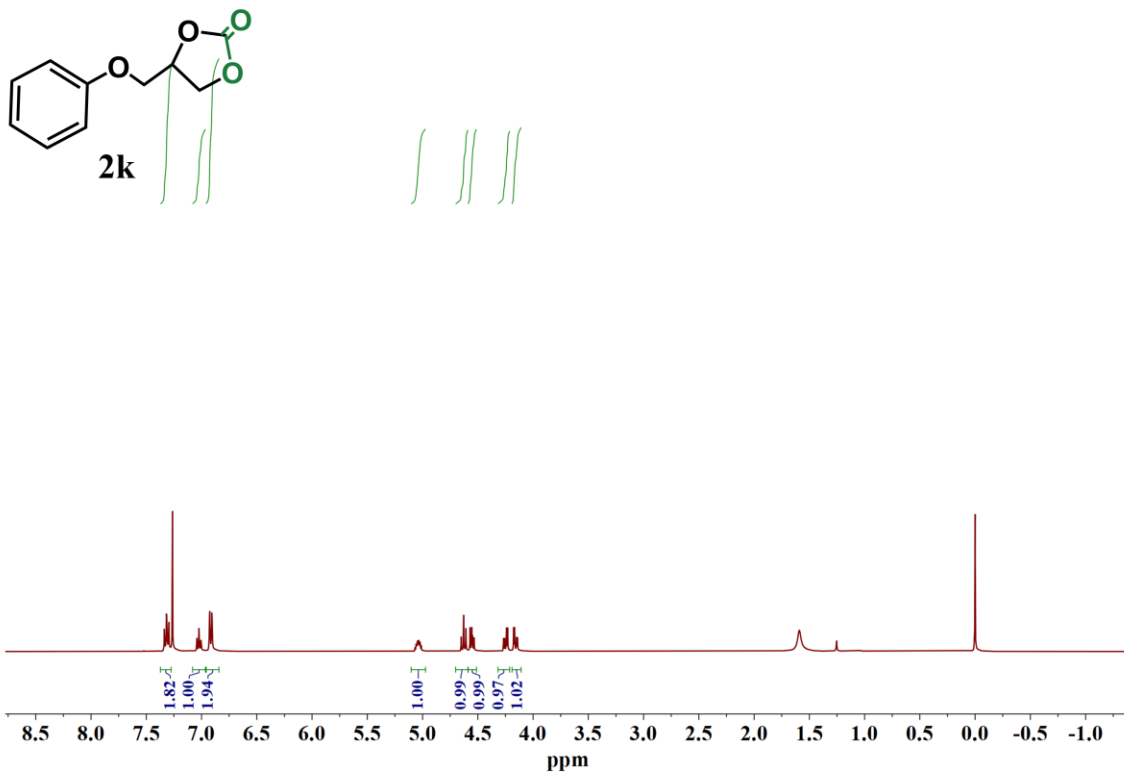

**Fig. S32.**  $^1\text{H}$  NMR spectrum of **2k** (400 MHz,  $\text{CDCl}_3$ , 298 K).

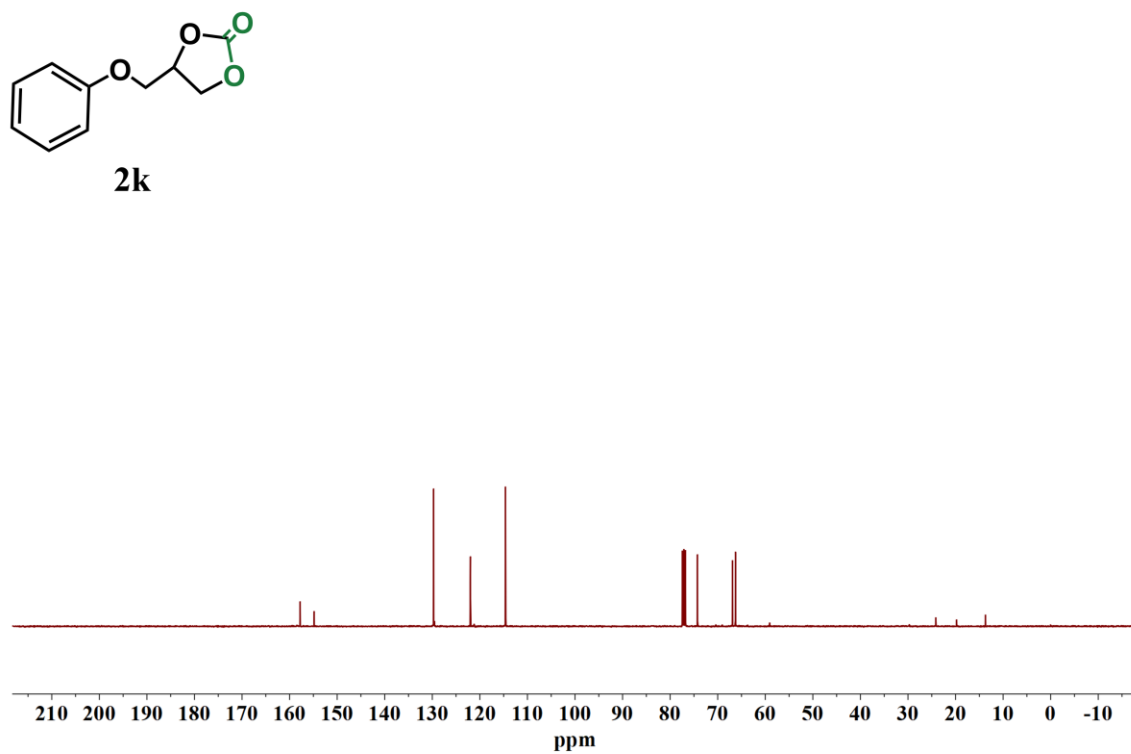

**Fig. S33.**  $^{13}\text{C}$  NMR spectrum of **2k** (126 MHz,  $\text{CDCl}_3$ , 298 K).

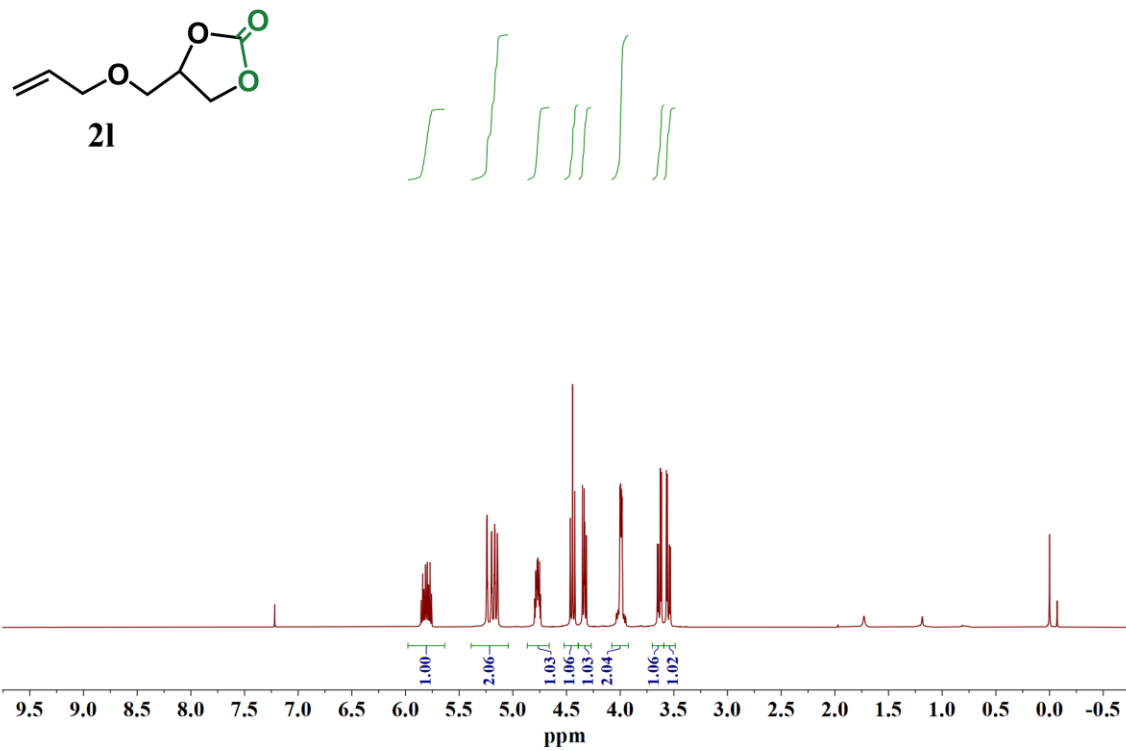

Fig. S34.  $^1\text{H}$  NMR spectrum of **21** (400 MHz,  $\text{CDCl}_3$ , 298 K).

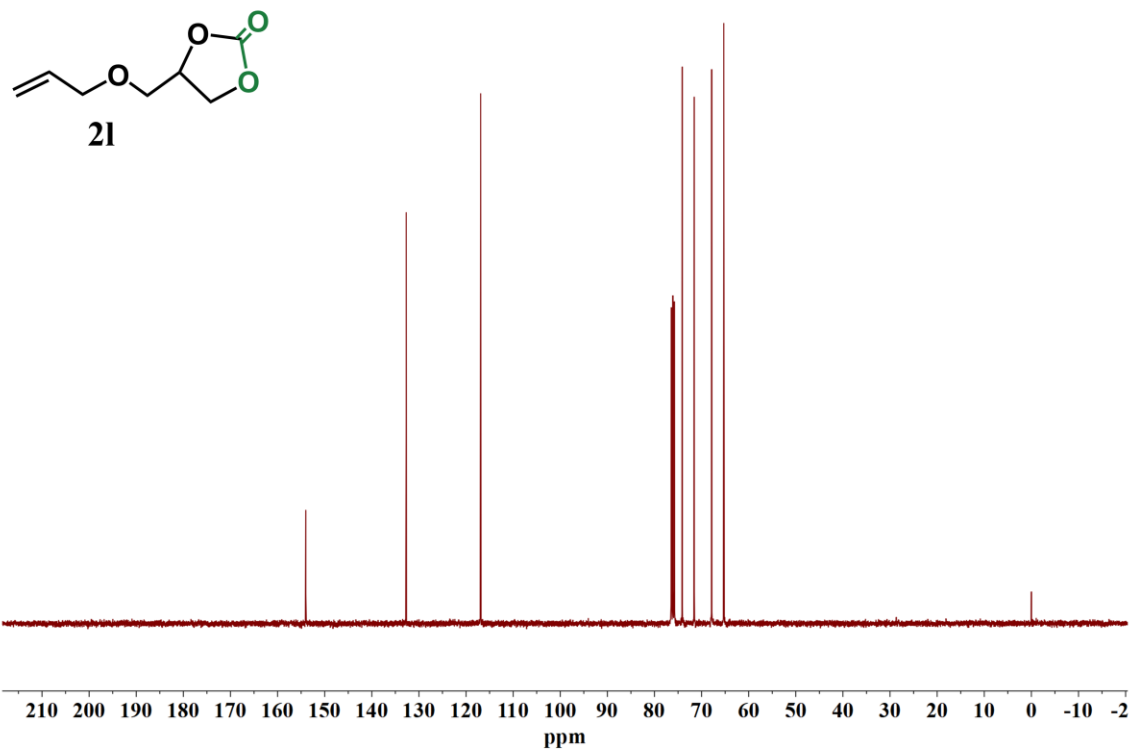

Fig. S35.  $^{13}\text{C}$  NMR spectrum of **21** (126 MHz,  $\text{CDCl}_3$ , 298 K).

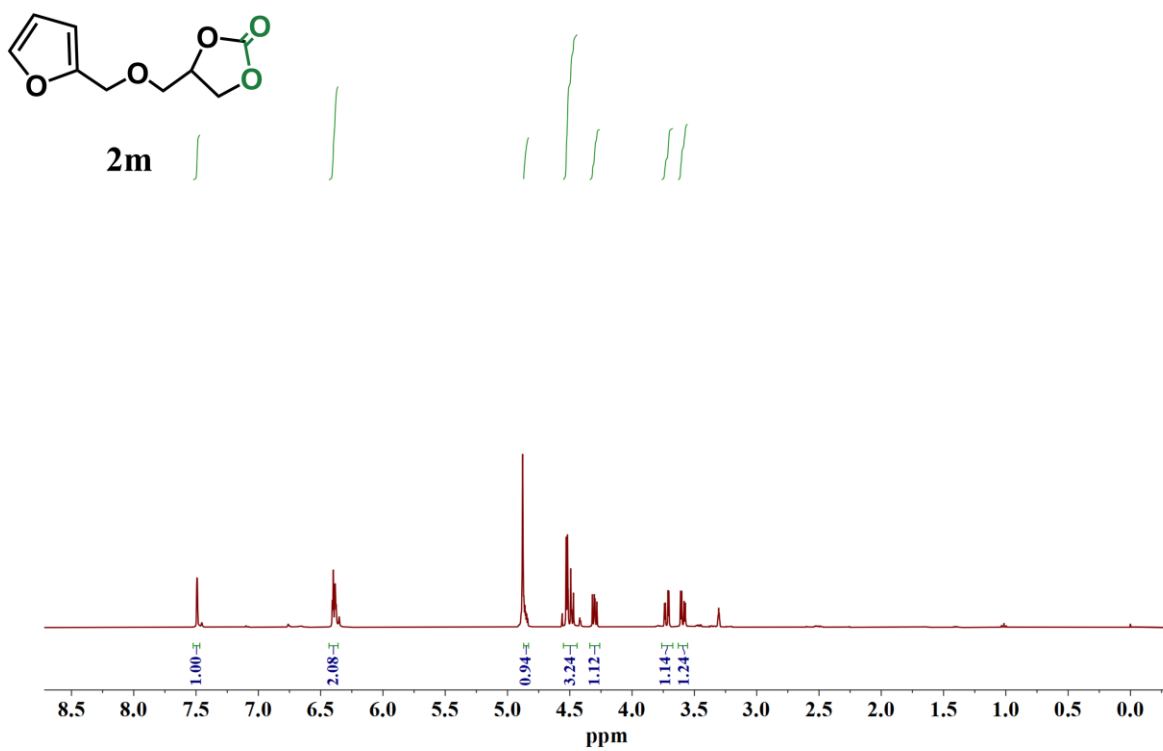

**Fig. S36.**  $^1\text{H}$  NMR spectrum of **2m** (400 MHz,  $\text{CDCl}_3$ , 298 K).

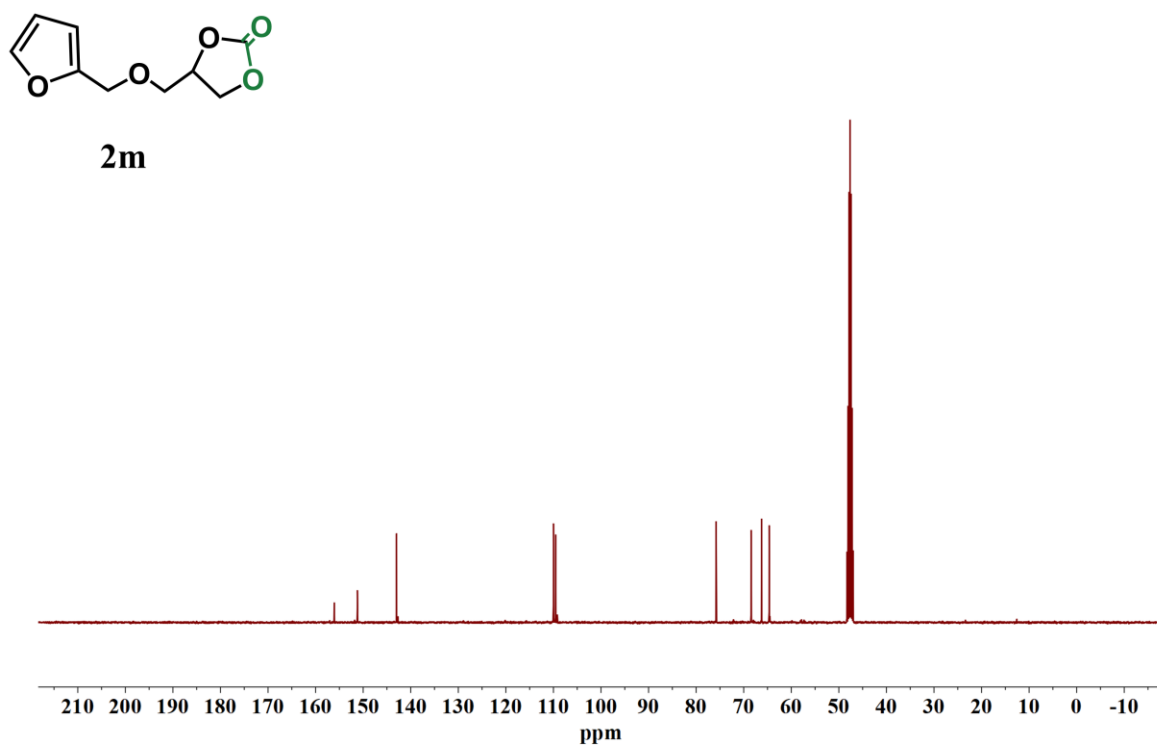

**Fig. S37.**  $^{13}\text{C}$  NMR spectrum of **2m** (126 MHz,  $\text{CDCl}_3$ , 298 K).

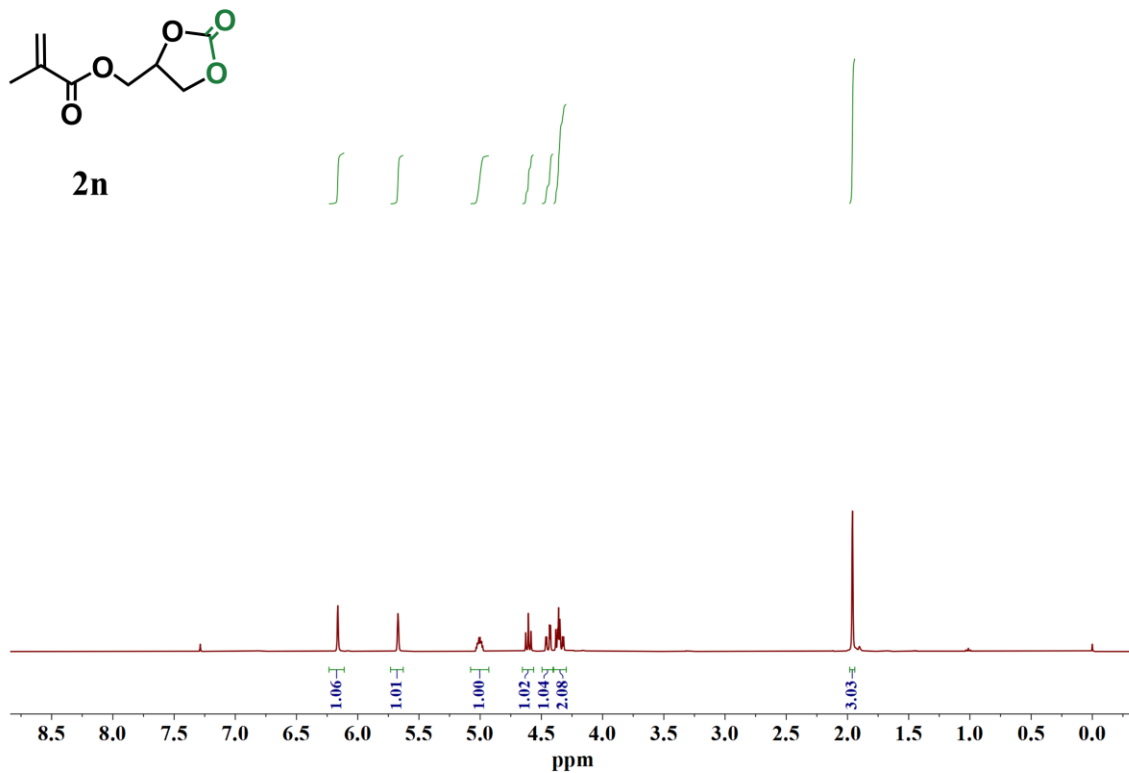

**Fig. S38.**  $^1\text{H}$  NMR spectrum of **2n** (400 MHz,  $\text{CDCl}_3$ , 298 K).

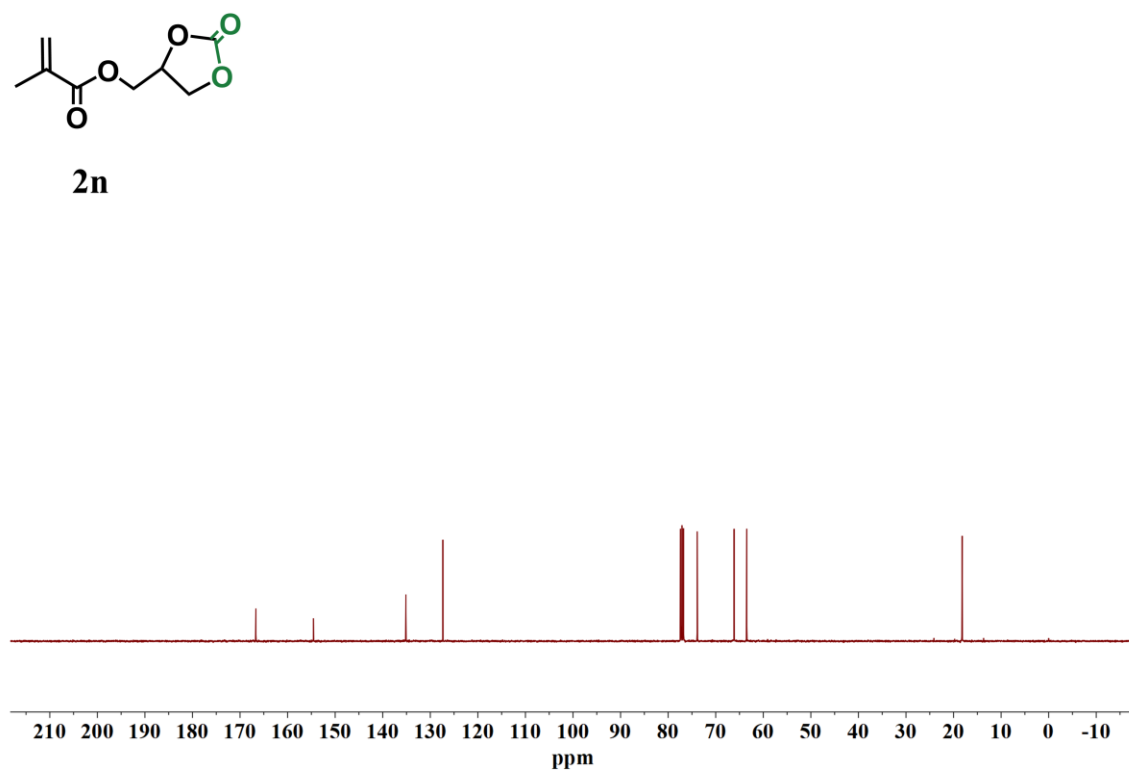

**Fig. S39.**  $^{13}\text{C}$  NMR spectrum of **2n** (126 MHz,  $\text{CDCl}_3$ , 298 K).

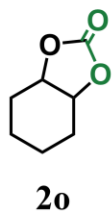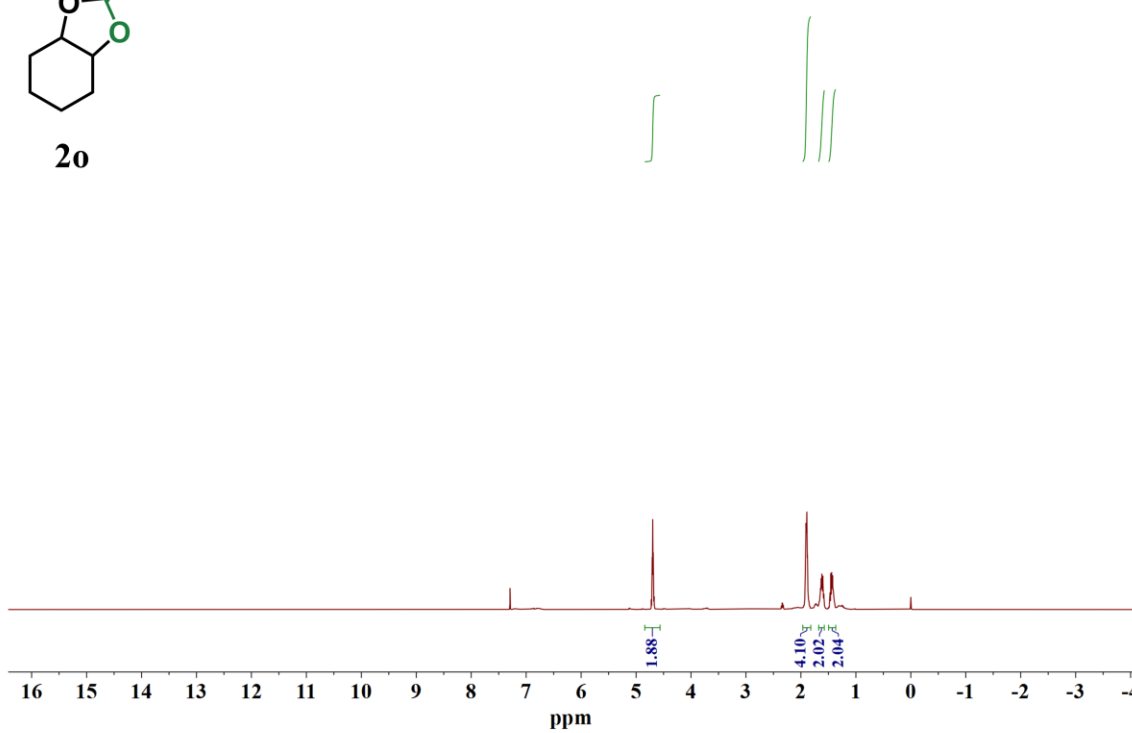

**Fig. S40.**  $^1\text{H}$  NMR spectrum of **2o** (400 MHz,  $\text{CDCl}_3$ , 298 K).

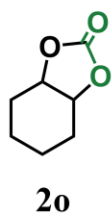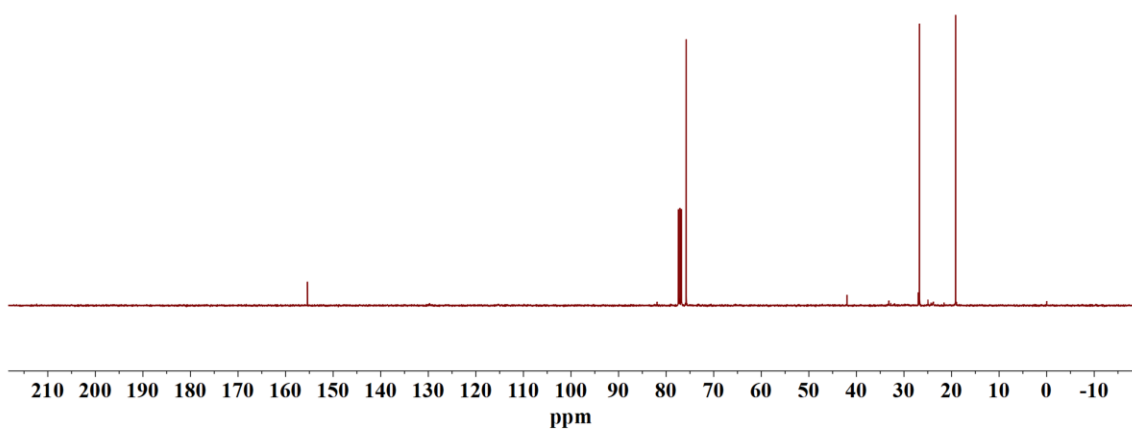

**Fig. S41.**  $^{13}\text{C}$  NMR spectrum of **2o** (126 MHz,  $\text{CDCl}_3$ , 298 K).

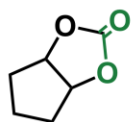

**2p**

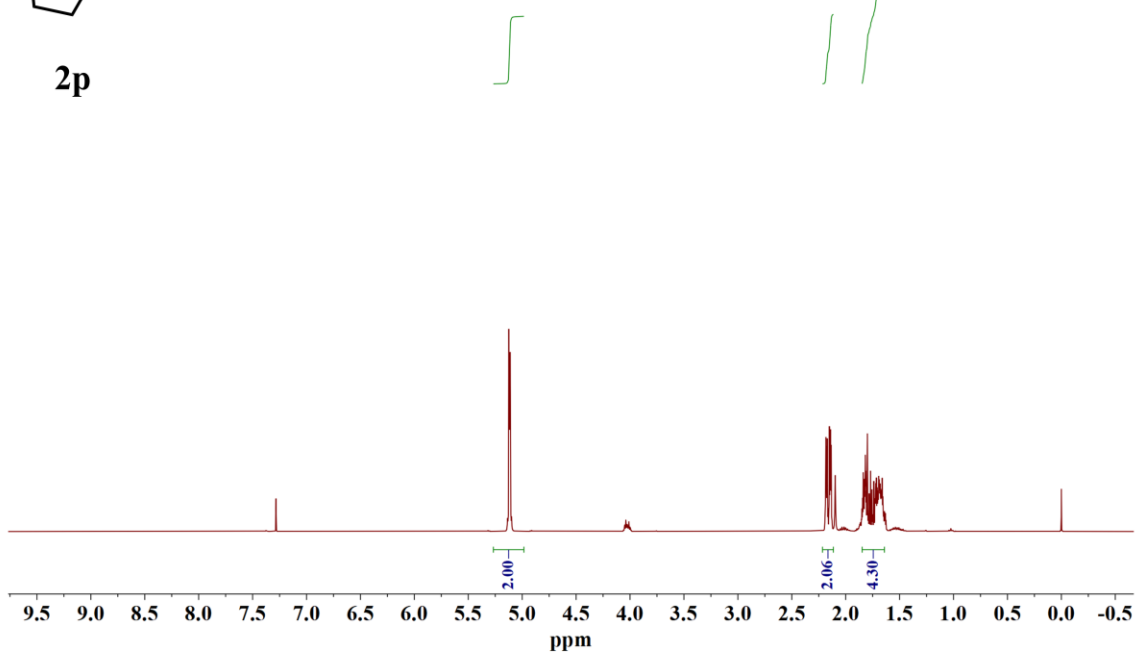

**Fig. S42.** <sup>1</sup>H NMR spectrum of **2p** (400 MHz, CDCl<sub>3</sub>, 298 K).

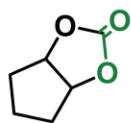

**2p**

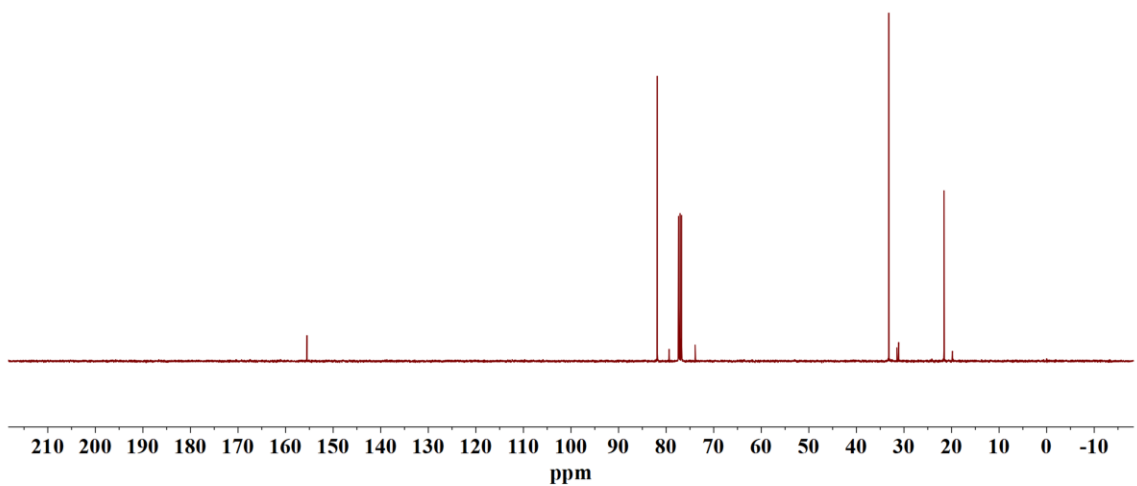

**Fig. S43.** <sup>13</sup>C NMR spectrum of **2p** (126 MHz, CDCl<sub>3</sub>, 298 K).

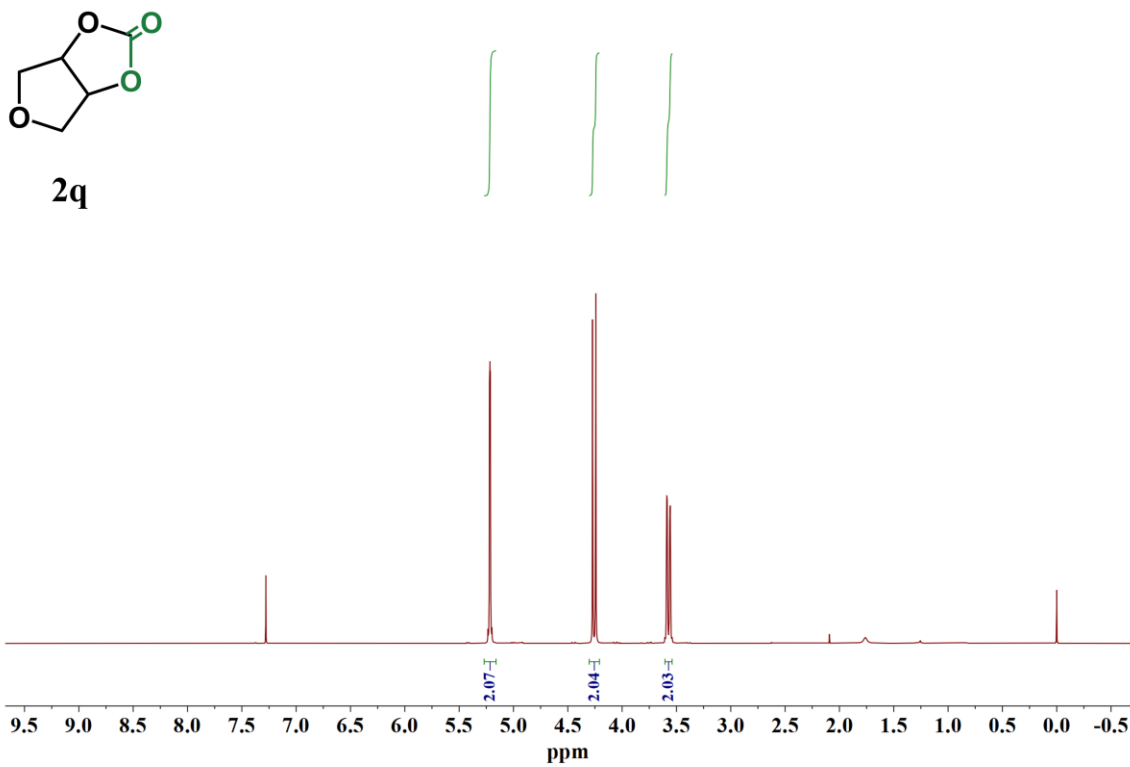

**Fig. S44.**  $^1\text{H}$  NMR spectrum of **2q** (400 MHz,  $\text{CDCl}_3$ , 298 K).

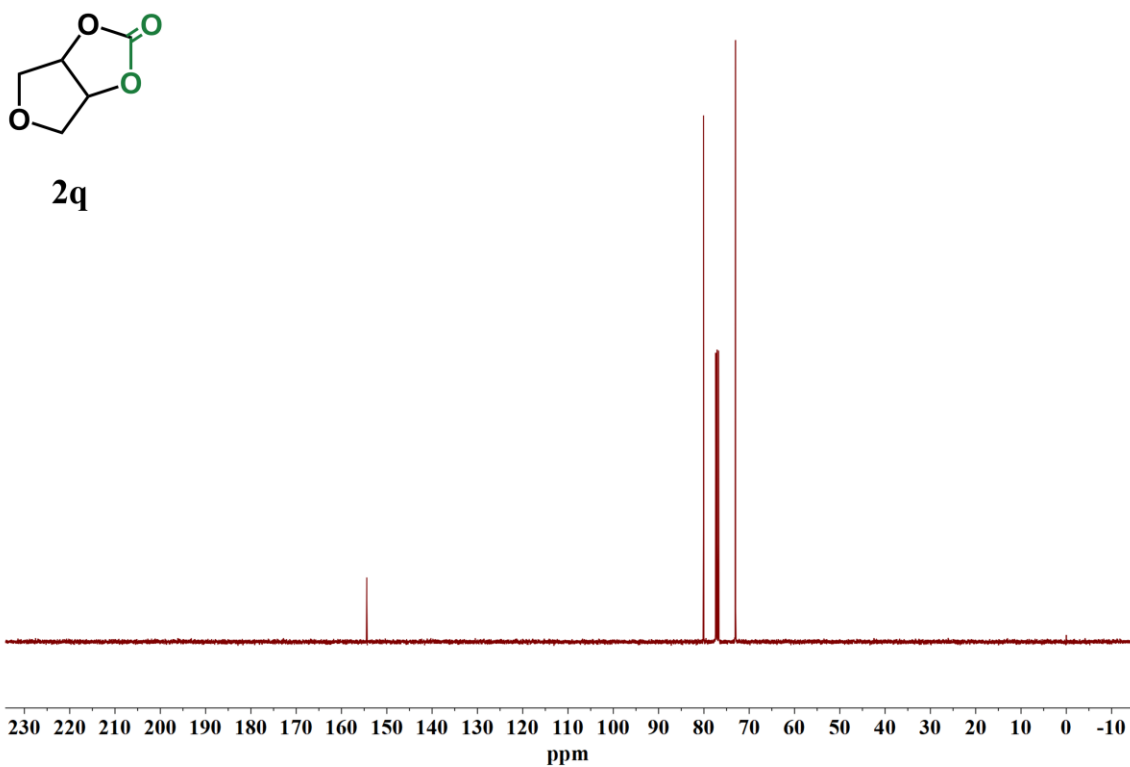

**Fig. S45.**  $^{13}\text{C}$  NMR spectrum of **2q** (126 MHz,  $\text{CDCl}_3$ , 298 K).



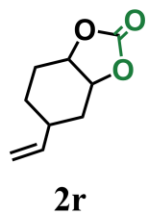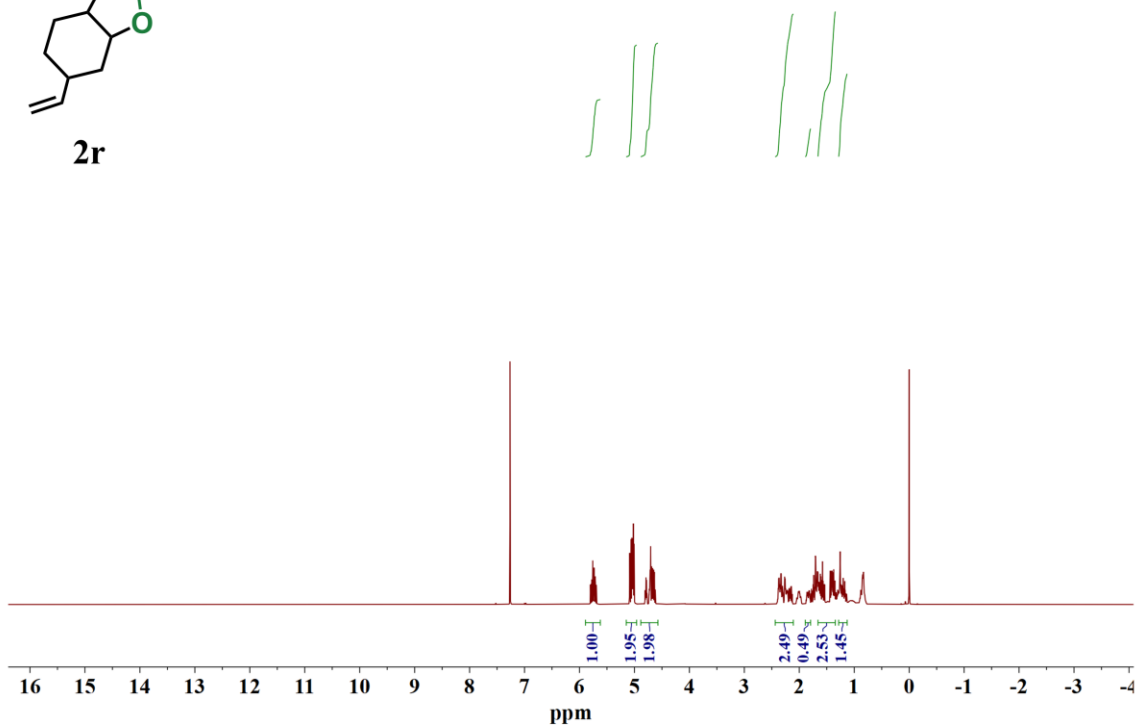

**Fig. S46.** <sup>1</sup>H NMR spectrum of **2r** (400 MHz, CDCl<sub>3</sub>, 298 K).

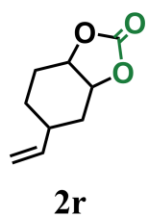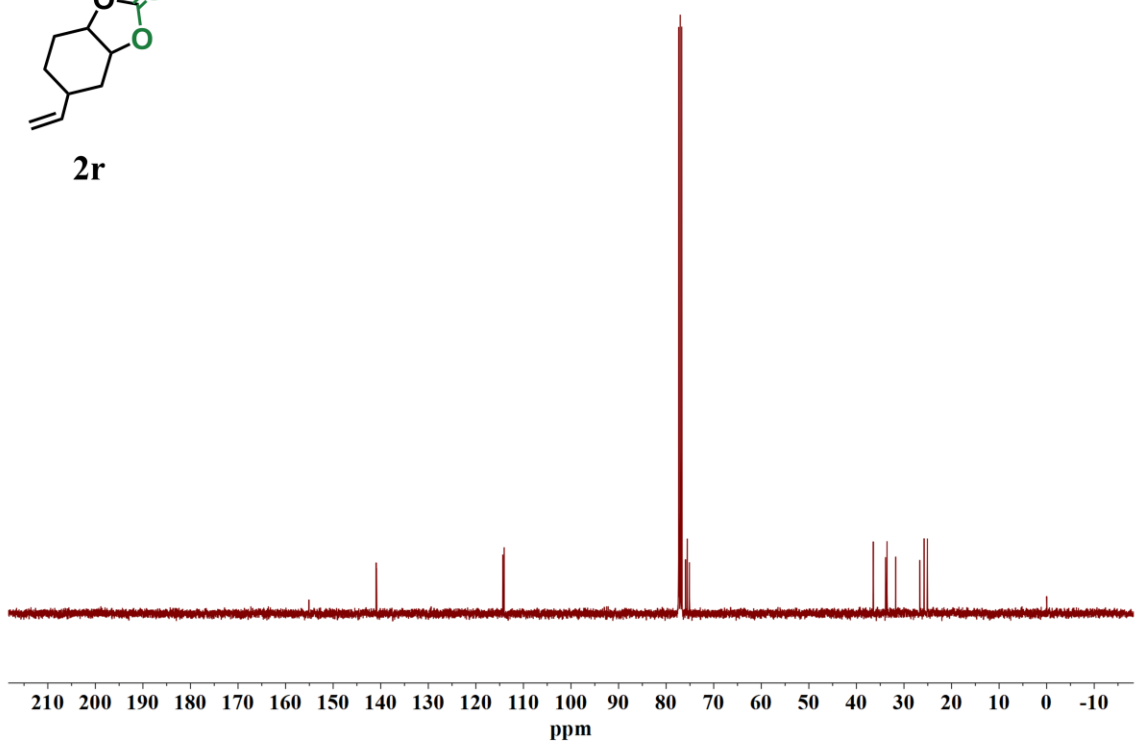

**Fig. S47.** <sup>13</sup>C NMR spectrum of **2r** (126 MHz, CDCl<sub>3</sub>, 298 K).

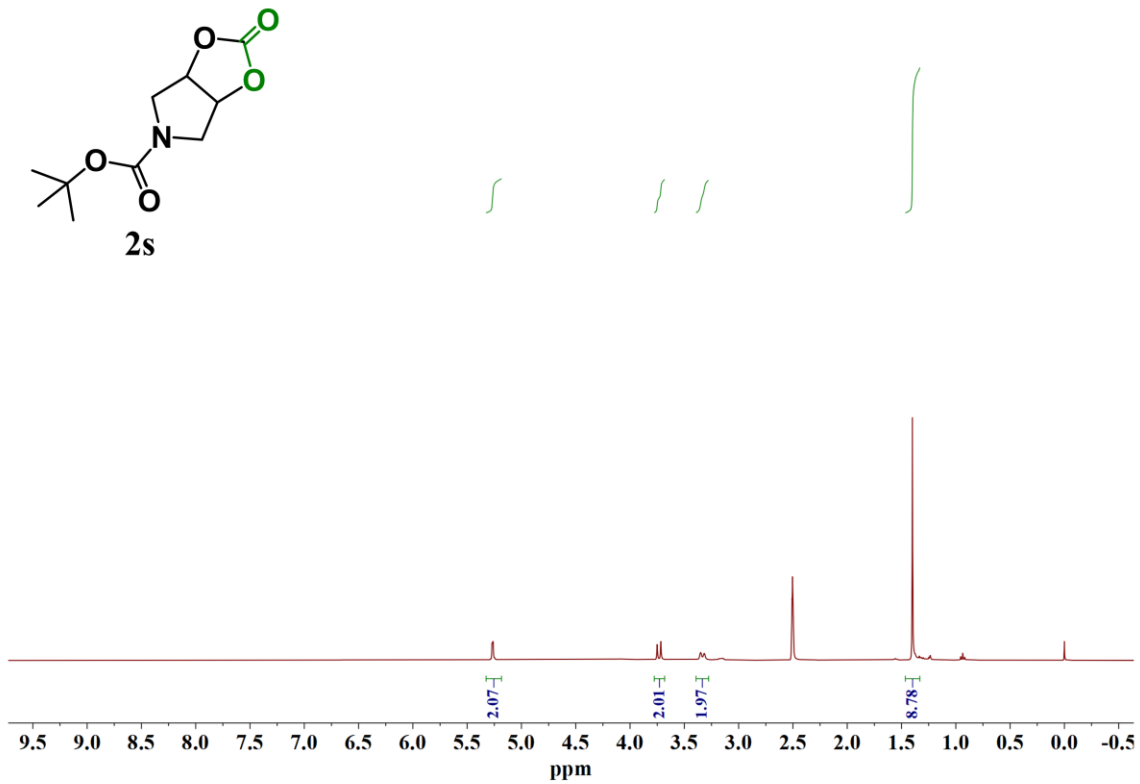

Fig. S48. <sup>1</sup>H NMR spectrum of **2s** (400 MHz, CDCl<sub>3</sub>, 298 K).

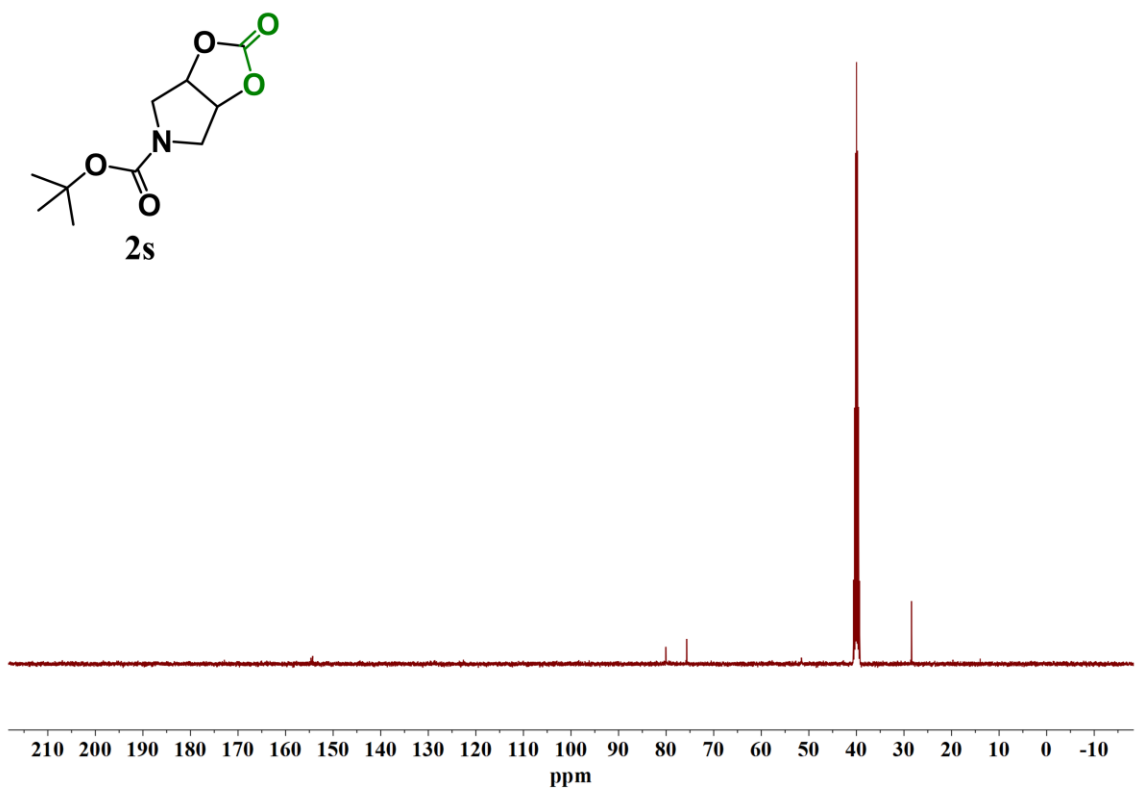

Fig. S49. <sup>13</sup>C NMR spectrum of **2s** (126 MHz, CDCl<sub>3</sub>, 298 K).

## References of supplementary material

1. X. Yang, Z. Liu, P. Chen, F. Liu and T. Zhao, *Journal of Co2 Utilization*, 2022, **58**, 101936.
2. B. Liu, H. Yu, Z. Li, J. He, Y. Hu, X. Zou, L. Lu, S. Cao, C. Ma and K. Guo, *Journal of Environmental Chemical Engineering*, 2023, **11**, 110886.
3. W. Liu, Q. Su, Z. Xu, M. Fu, H. Zhang and W. Cheng, *Molecular Catalysis*, 2024, **553**, 113751.
4. X. Wu, C. Chen, Z. Guo, M. North and A. C. Whitwood, *Acs Catalysis*, 2019, **9**, 1895-1906.
5. W. Cho, M. S. Shin, S. Hwang, H. Kim, M. Kim, J. G. Kim and Y. Kim, *Journal of Industrial and Engineering Chemistry*, 2016, **44**, 210-215.
6. N. Bragato, A. Perosa, M. Selva and G. Fiorani, *Chemcatchem*, 2023, **15**, e202201373.
7. A.-H. Liu, Y.-L. Dang, H. Zhou, J.-J. Zhang and X.-B. Lu, *Chemcatchem*, 2018, **10**, 2686-2692.
8. N. Bragato, A. Perosa, M. Selva, G. Fiorani and R. Calmanti, *Green Chemistry*, 2023, **25**, 4849-4860.
9. H. Tong, Y. Qu, Z. Li, J. He, X. Zou, Y. Zhou, T. Duan, B. Liu, J. Sun and K. Guo, *Chemical Engineering Journal*, 2022, **444**, 135478.
10. A. Chen, C. Chen, Y. Xiu, X. Liu, J. Chen, L. Guo, R. Zhang and Z. Hou, *Green Chemistry*, 2015, **17**, 1842-1852.
11. C. Li, W. Xiong, T. Zhao, F. Liu, H. Cai, P. Chen and X. Hu, *Applied Catalysis B-Environmental*, 2023, **324**, 122217.
